# Supplementary material for: Genetic Associations Between Stress-Related Disorders and Autoimmune Disease
Source: Atypon-hosted journal article supplement (doi:10.1176/appi.ajp.20220364), 2023-04-01
Supplement: appi.ajp.20220364.ds001.pdf [file appi.ajp.20220364.ds001.pdf]

## **Genetic associations between stress-related disorders and autoimmune disease**

Yu Zeng, Chen Suo, Shuyang Yao, Donghao Lu, Henrik Larsson, Brian M. D'Onofrio, Paul

Lichtenstein, Fang Fang, Unnur A. Valdimarsdóttir, Huan Song

### **Content**

### **Supplementary Methods**

### **Supplementary Tables**

**Table S1** Genome-wide Association Study summary statistics in this study

**Table S2** International Classification of Disease (ICD) codes, ninth (ICD-9) and tenth (ICD-10) revisions for diagnoses used in this study

**Table S3** Primary care data READ v2/v3 codes for diagnoses used in this study

**Table S4** Associations between **stress-related disorder PRSs** and the risk of **stress-related disorders** at different p value thresholds\*

**Table S5** Associations between **autoimmune disease PRSs** and the risk of **autoimmune disease** at different p value thresholds\*

**Table S6** Associations between **autoimmune thyroid disease PRSs** and the risk of autoimmune thyroid disease at different p value thresholds\*

**Table S7** Associations between **rheumatoid arthritis PRSs** and the risk of **rheumatoid arthritis** disease at different p value thresholds

**Table S8** Associations between **ulcerative colitis PRSs** and the risk of **ulcerative colitis** at different p value thresholds

**Table S9** Associations between **psoriasis PRSs** and the risk of **psoriasis** at different p value thresholds\*

**Table S10** Associations between **diabetes mellitus - insulin dependent PRSs** and the risk of **diabetes mellitus - insulin dependent** at different p value thresholds

**Table S11** Associations between **giant cell arteritis PRSs** and the risk of **giant cell arteritis** at different p value thresholds\*

**Table S12** Consistency of variants<sup>a</sup> associated with autoimmune thyroid disease between UK Biobank GWAS data and publicly available GWAS data

**Table S13** Consistency of variants<sup>a</sup> associated with rheumatoid arthritis between UK Biobank GWAS data and publicly available GWAS data

**Table S14** Consistency of variants<sup>a</sup> associated with ulcerative colitis between UK Biobank GWAS data

and publicly available GWAS data

**Table S15** Consistency of variants<sup>a</sup> associated with diabetes mellitus - insulin dependent between UK Biobank GWAS data and publicly available GWAS data

**Table S16** The proportions of specific subtypes of stress-related disorders in database

**Table S17** Genetic associations between stress-related disorders and autoimmune disease (PRS based on publicly available GWAS data)

**Table S18** Top three pathways of the corresponding shared MCODE components between **stress-related disorder** and **autoimmune diseases** based on protein-protein interaction enrichment analyses

**Table S19** Top three pathways of the corresponding shared MCODE components between **stress-related disorders** and **autoimmune thyroid disease\*** based on protein-protein interaction enrichment analyses

**Table S20** Risk genes shared by **posttraumatic stress disorder and autoimmune disease\***

**Table S21** Top three pathways of the corresponding shared MCODE components between **posttraumatic stress disorder** and **autoimmune diseases** based on protein-protein interaction enrichment analyses\*

**Table S22** Risk genes shared by **posttraumatic stress disorder and autoimmune thyroid disease\***

**Table S23** Top three pathways of the corresponding shared MCODE components between **posttraumatic stress disorder** and **autoimmune thyroid diseases** based on protein-protein interaction enrichment analyses\*

## Supplementary Figures

**Figure S1** Study design for familial co-aggregation analyses

**Figure S2** Study design for phenotypic association analyses in UK Biobank

**Figure S3** Study design for polygenic risk scores (PRSs) analyses

**Figure S4** Variance explained for one trait by polygenic risk scores (PRSs) for another trait under 11 p value thresholds

**Figure S5** Study design for polygenic risk scores (PRSs) analyses of specific disease type

**Figure S6** Variance explained for stress-related disorders by polygenic risk scores (PRSs) for corresponding autoimmune disease under 11 p value thresholds (**GWAS summary statistics from UK Biobank GWAS data**)

**Figure S7** Variance explained for stress-related disorders by polygenic risk scores (PRSs) for corresponding autoimmune disease under 11 p value thresholds (**GWAS summary statistics from publicly available GWAS data**)

**Figure S8** Manhattan of the SNP-Based GWAS of corresponding autoimmune disease using UK Biobank data comparing with publicly available GWAS data.

**Figure S9** Association between inpatient stress-related disorders/ posttraumatic stress disorder and autoimmune disease

**Figure S10** Identification of genes and pathways shared by stress-related disorders and autoimmune thyroid disease\*

**Figure S11** Identification of genes and pathways shared by posttraumatic stress disorder and autoimmune disease\*

**Figure S12** Identification of genes and pathways shared by posttraumatic stress disorder and autoimmune thyroid disease\*

## Supplementary methods

### Data sources

The Swedish population and health registers are linked by the national identification numbers which are unique for all Swedish residents.(1) The National Patient Register contains nationwide data on inpatient care from 1987 and specialist outpatient care from 2001.(2) The Multi-Generation Register provides complete information on familial links for almost all individuals born in Sweden since 1932,(3) and the Causes of Death Register has death records for all deaths of Swedish residents since 1961.

UK Biobank is a cohort study where 502,507 participants, aged 40-69 years, were recruited across the UK between 2006 and 2010. At recruitment, information about socio-demographic characteristics and lifestyles was collected, and the participants also agreed to have their future health monitored, through data linkage with multiple national health registers. UK Biobank inpatient hospital data include data extracted from Hospital Episode Statistics from England, Patient Episode Database for Wales from Wales, and the Scottish Morbidity Record from Scotland, covering all the UK Biobank participants from 1997 onward.(4) As of 2017, the UK Biobank primary care data were obtained from multiple general practice databases, covering around 45% of the UK Biobank participants.(5) The individual-level genotyping data of UK Biobank were obtained from blood samples collected at baseline, using two genotyping arrays specifically designed for UK Biobank with 95% shared marker content.(4) Genotyping, quality control, and genotype imputation were performed by the UK Biobank team.(4) Kinship coefficients for checking family relationship, calculated using KING tool, and principal components (PCs), were also provided by the UK Biobank team.(4)

Summary statistics of genome-wide association studies (GWAS) for stress-related disorders was generated based on 9,831 cases and 19,225 controls in Danish population, available at website of iPSYCH, (6) while posttraumatic stress disorder was available at Psychiatric Genomics Consortium (23,212 cases and 151,447 controls).(7) In addition, we performed GWAS for autoimmune disease and specific autoimmune diseases (i.e., autoimmune thyroid disease, rheumatoid arthritis, ulcerative colitis, psoriasis, diabetes mellitus - insulin dependent and giant cell arteritis, see

Supplementary Methods Figure 1) using individual-level genotyping data from White British UK Biobank population. For PRS analysis, the base data was a subsample (half) of UK Biobank participants, whilst for the genetic analyses to identify common genes and pathways, the GWAS was performed using all individuals with available genotyping data. Detailed information of publicly available GWAS summary data is presented in Supplementary Table 1.

The requirement for informed consent is not needed in national register-based studies in Sweden, while the Swedish Twin Registry and the UK Biobank collected all data after written informed consent was obtained from each participant. Data from international consortia (summary statistics) are publicly available.

### **Quality control on UK Biobank genotyping data**

Among 408,885 White British participants, we removed 1,540 individuals who were outliers based on a variant call <98%, and 30,474 related individuals with a kinship coefficient >0.0884. We also constrained the genetic analyses to autosomal biallelic SNPs and removed SNPs with a call rate <98%, minor allele frequency (MAF) <0.01, imputation quality score <0.8, or deviations from Hardy-Weinberg equilibrium ( $P < 1 \times 10^{-6}$ ). Considering the long-range linkage disequilibrium (LD) and special genetic architecture in the extended major histocompatibility complex (MHC) region (chr6: 25–34 Mb), we removed SNPs in this region. The final data contained 6,052,596 variants for 376,871 participants.

### **LD score genetic correlation analysis**

In brief, LD score regression was implemented by regressing the test statistics of SNPs from GWAS summary against the LD scores for genetic variants across the whole genome to quantify the contributions of polygenic effects. GWAS summary statistics used for such analyses were described in Data Sources. With reference SNP panel of European ancestry LD scores from 1000 genomes,(8) we estimated the genetic correlation using unconstrained-intercept LD score regression, to control for the potential bias of population stratification.

### **Protein-protein interaction enrichment analysis**

Specifically, for a given gene list of each trait, protein-protein interaction (PPI) enrichment analysis was applied based

on the following genomic interaction databases: STRING,(9) BioGrid,(10) OmniPath,(11) and InWeb\_IM.(12) The protein interaction network was formed by subset of proteins having physical interactions with at least one of the other proteins in the list. By means of Molecular Complex Detection (MCODE) algorithm, network components with dense connection were identified. Finally, based on pathway and process enrichment analysis applied to each MCODE component independently, the significant pathways, according to q-values calculated using the Benjamini-Hochberg procedure,(13) were retained as the functional description of the corresponding components.

## References

1. Ludvigsson JF, Otterblad-Olausson P, Pettersson BU, Ekblom A. The Swedish personal identity number: possibilities and pitfalls in healthcare and medical research. *European journal of epidemiology*. 2009;24:659-667.
2. Ludvigsson JF, Andersson E, Ekblom A, Feychting M, Kim JL, Reuterwall C, Heurgren M, Olausson PO. External review and validation of the Swedish national inpatient register. *BMC public health*. 2011;11:450.
3. Ekblom A: The Swedish Multi-generation Register. in *Methods in Biobanking*. Edited by Dillner J. Totowa, NJ, Humana Press; 2011. pp. 215-220.
4. Bycroft C, Freeman C, Petkova D, Band G, Elliott LT, Sharp K, Motyer A, Vukcevic D, Delaneau O, O'Connell J, Cortes A, Welsh S, Young A, Effingham M, McVean G, Leslie S, Allen N, Donnelly P, Marchini J. The UK Biobank resource with deep phenotyping and genomic data. *Nature*. 2018;562:203-209.
5. UK\_Biobank: Primary Care Linked Data  
[https://biobank.ndph.ox.ac.uk/ukb/ukb/docs/primary\\_care\\_data.pdf](https://biobank.ndph.ox.ac.uk/ukb/ukb/docs/primary_care_data.pdf).
6. Meier SM, Tronetti K, Purves KL, Als TD, Grove J, Laine M, Pedersen MG, Bybjerg-Grauholm J, Bækved-Hansen M, Sokolowska E, Mortensen PB, Hougaard DM, Werge T, Nordentoft M, Breen G, Borglum AD, Eley TC, Hovatta I, Mattheisen M, Mors O. Genetic Variants Associated With Anxiety and Stress-Related Disorders: A Genome-Wide Association Study and Mouse-Model Study. *JAMA Psychiatry*. 2019;76:924-932.
7. Nievergelt CM, Maihofer AX, Klengel T, Atkinson EG, Chen CY, Choi KW, Coleman JRI, Dalvie S, Duncan LE, Gelernter J, Levey DF, Logue MW, Polimanti R, Provost AC, Ratanatharathorn A, Stein MB, Torres K, Aiello AE, Almli LM, Amstadter AB, Andersen SB, Andreassen OA, Arbisi PA, Ashley-Koch AE, Austin SB, Avdibegovic E, Babić D, Bækvad-Hansen M, Baker DG, Beckham JC, Bierut LJ, Bisson JI, Boks MP, Bolger EA, Børglum AD, Bradley B, Brashear M, Breen G, Bryant RA, Bustamante AC, Bybjerg-Grauholm J, Calabrese JR, Caldas-de-Almeida JM, Dale AM, Daly MJ, Daskalakis NP, Deckert J, Delahanty DL, Dennis MF, Disner SG, Domschke K, Dzubur-Kulenovic A, Erbes CR, Evans A, Farrer LA, Feeny NC, Flory JD, Forbes D, Franz CE, Galea S, Garrett ME, Gelaye B, Geuze E, Gillespie C, Uka AG, Gordon SD, Guffanti G, Hammamieh R, Harnal S, Hauser MA, Heath AC, Hemmings SMJ, Hougaard DM, Jakovljevic M, Jett M, Johnson EO, Jones I, Jovanovic T, Qin XJ, Junglen AG, Karstoft KI, Kaufman ML, Kessler RC, Khan A, Kimbrel NA, King AP, Koen N, Kranzler HR, Kremen WS, Lawford BR, Lebois LAM, Lewis CE, Linnstaedt SD, Lori A, Lugonja B, Luykx JJ, Lyons MJ, Maples-Keller J, Marmar C, Martin AR, Martin NG, Maurer D, Mavissakalian MR, McFarlane A, McGlinchey RE, McLaughlin KA, McLean SA, McLeay S, Mehta D, Milberg WP, Miller MW, Morey RA, Morris CP, Mors O, Mortensen PB, Neale BM, Nelson EC, Nordentoft M, Norman SB, O'Donnell M, Orcutt HK, Panizzon MS, Peters ES, Peterson AL, Peverill M, Pietrzak RH, Polusny MA, Rice JP, Ripke S, Risbrough VB, Roberts AL, Rothbaum AO, Rothbaum BO, Roy-

Byrne P, Ruggiero K, Rung A, Rutten BPF, Saccone NL, Sanchez SE, Schijven D, Seedat S, Seligowski AV, Seng JS, Sheerin CM, Silove D, Smith AK, Smoller JW, Sponheim SR, Stein DJ, Stevens JS, Sumner JA, Teicher MH, Thompson WK, Trapido E, Uddin M, Ursano RJ, van den Heuvel LL, Van Hooff M, Vermetten E, Vinkers CH, Voisey J, Wang Y, Wang Z, Werge T, Williams MA, Williamson DE, Winternitz S, Wolf C, Wolf EJ, Wolff JD, Yehuda R, Young RM, Young KA, Zhao H, Zoellner LA, Liberzon I, Ressler KJ, Haas M, Koenen KC. International meta-analysis of PTSD genome-wide association studies identifies sex- and ancestry-specific genetic risk loci. *Nat Commun.* 2019;10:4558.

8. Schorsch E: European ancestry LD scores

[https://data.broadinstitute.org/alkesgroup/LDSCORE/eur\\_w\\_ld\\_chr.tar.bz2](https://data.broadinstitute.org/alkesgroup/LDSCORE/eur_w_ld_chr.tar.bz2).

9. Szklarczyk D, Gable AL, Lyon D, Junge A, Wyder S, Huerta-Cepas J, Simonovic M, Doncheva NT, Morris JH, Bork P, Jensen LJ, Mering Christian v. STRING v11: protein–protein association networks with increased coverage, supporting functional discovery in genome-wide experimental datasets. *Nucleic Acids Research.* 2018;47:D607-D613.

10. Stark C, Breitkreutz BJ, Reguly T, Boucher L, Breitkreutz A, Tyers M. BioGRID: a general repository for interaction datasets. *Nucleic Acids Res.* 2006;34:D535-539.

11. Türei D, Korcsmáros T, Saez-Rodriguez J. OmniPath: guidelines and gateway for literature-curated signaling pathway resources. *Nature methods.* 2016;13:966-967.

12. Li T, Wernersson R, Hansen RB, Horn H, Mercer J, Slodkowitz G, Workman CT, Rigina O, Rapacki K, Stærfeldt HH, Brunak S, Jensen TS, Lage K. A scored human protein-protein interaction network to catalyze genomic interpretation. *Nature methods.* 2017;14:61-64.

13. Zhou Y, Zhou B, Pache L, Chang M, Khodabakhshi AH, Tanaseichuk O, Benner C, Chanda SK. Metascape provides a biologist-oriented resource for the analysis of systems-level datasets. *Nature Communications.* 2019;10.

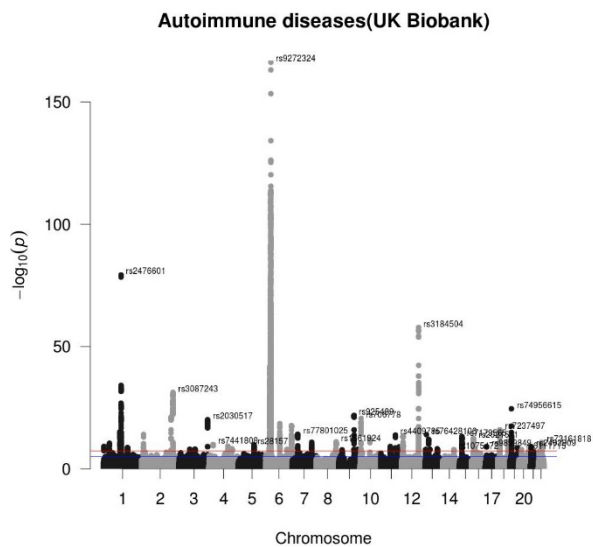

**A. Autoimmune disease**

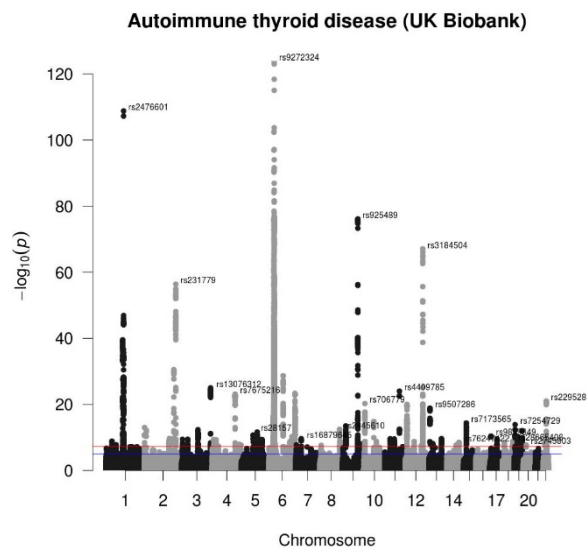

**B. Autoimmune thyroid disease**

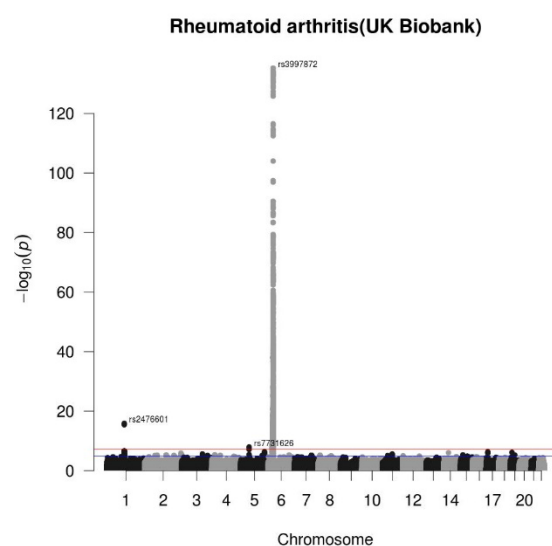

**C. Rheumatoid arthritis**

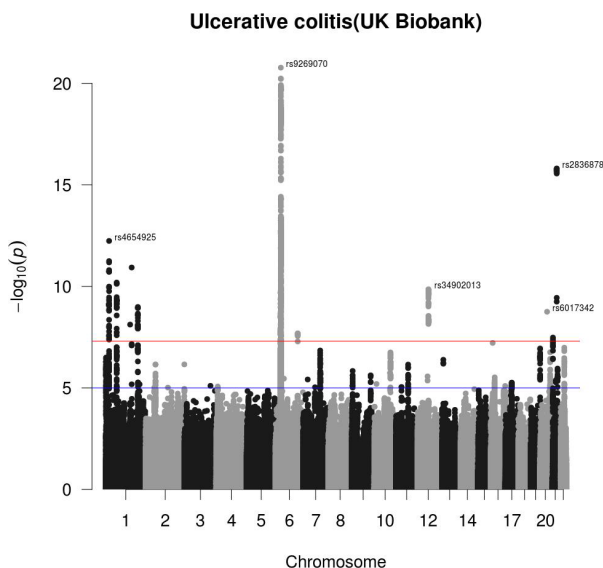

**D. Ulcerative colitis**

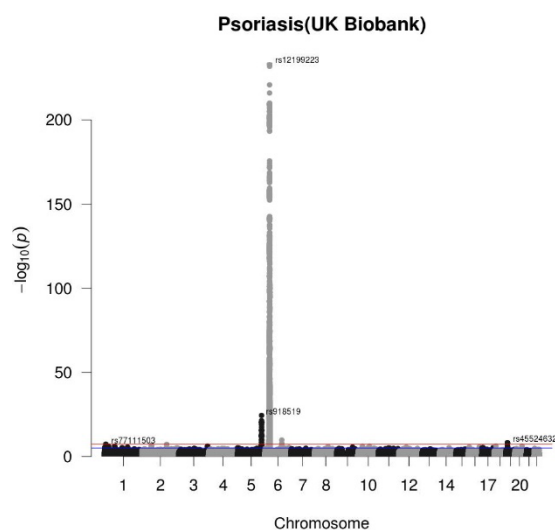

**E. Psoriasis**

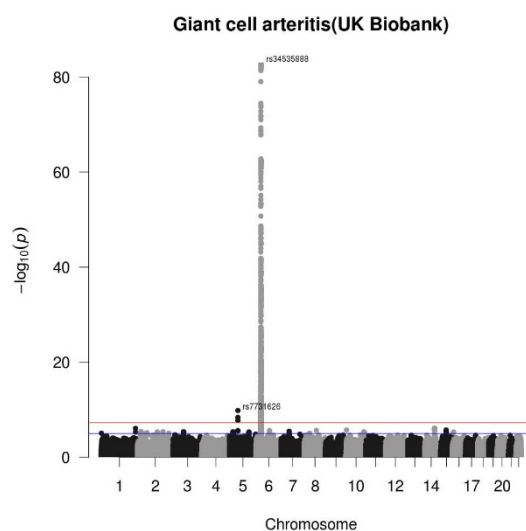

**F. Giant cell arteritis/ Polymyalgia**

**Supplementary Method Figure 1** Manhattan of the SNP-Based GWAS of corresponding autoimmune disease using UK Biobank. SNP= single-nucleotide polymorphism. GWAS= genome-wide association studies.



## Supplementary Tables

**Table S1** Genome-wide Association Study summary statistics in this study

| Trait                                        | UK Biobank GWAS data |          | Publicly available GWAS data |                   |        |          |
|----------------------------------------------|----------------------|----------|------------------------------|-------------------|--------|----------|
|                                              | Cases                | Controls | Publish year                 | Ancestry          | Cases  | Controls |
| Autoimmune disease                           | 48,730               | 328,141  | -                            | -                 | -      | -        |
| Autoimmune thyroid disease*                  | 22,224               | 354,647  | 2020                         | European ancestry | 30,234 | 725,172  |
| Rheumatoid arthritis                         | 6,729                | 370,142  | 2014                         | European ancestry | 14,361 | 43,923   |
| Ulcerative colitis                           | 3,788                | 373,083  | 2017                         | European ancestry | 12,366 | 33,609   |
| Psoriasis                                    | 3,781                | 373,090  | -                            | -                 | -      | -        |
| Diabetes mellitus - insulin dependent        | 3,329                | 373,542  | 2017                         | European ancestry | 5,913  | 8,828    |
| Giant cell arteritis/ Polymyalgia rheumatica | 3,391                | 373,480  | -                            | -                 | -      | -        |
| Stress-related disorders                     | -                    | -        | 2019                         | European ancestry | 9,831  | 19,225   |
| Posttraumatic stress disorder*               | -                    | -        | 2019                         | European ancestry | 23,212 | 151,447  |

\* Publicly available GWAS data for autoimmune thyroid disease and posttraumatic stress disorder include UK Biobank samples, therefore it was not used for PRS calculation. -: No available data

**Table S2** International Classification of Disease (ICD) codes, ninth (ICD-9) and tenth (ICD-10) revisions for diagnoses used in this study

| Diseases                            | Diseases                                                                                  | ICD-9                              | ICD-10                                          |
|-------------------------------------|-------------------------------------------------------------------------------------------|------------------------------------|-------------------------------------------------|
| <b>All stress-related disorders</b> |                                                                                           | 309, 308                           | F43                                             |
| PTSD                                |                                                                                           | 309B                               | F43.1                                           |
| Acute stress reaction               |                                                                                           | 309A, 308                          | F43.0                                           |
| Adjustment disorder                 |                                                                                           | 309X                               | F43.2                                           |
| Other stress reaction               |                                                                                           | 309X                               | F43.8, F43.9                                    |
| <b>Autoimmune diseases</b>          |                                                                                           |                                    |                                                 |
|                                     | Diabetes mellitus, insulin dependent                                                      | 250                                | E10                                             |
| <b>Disease of endocrine system</b>  | Autoimmune thyroid disease                                                                | 242A, 242X, 244W, 244X, 245C, 245W | E03.5, E03.9, E05.0, E05.5, E05.9, E06.3, E06.5 |
|                                     | Addison's disease                                                                         | 255E                               | E27.1, E27.2                                    |
|                                     | Autoimmune polyglandular syndrome                                                         | 258B                               | E31.0                                           |
|                                     | Reactive arthritis (Reiter's syndrome)                                                    | 099D, 711A                         | M02.3, M02.8, M02.9                             |
| <b>Inflammatory arthritis</b>       | Rheumatoid arthritis                                                                      | 714A-D, 719D                       | M05, M06, M08.0, M08.1, M08.2, M08.3, M08.4     |
|                                     | Ankylosing spondylitis                                                                    | 720A                               | M45                                             |
|                                     | Polyarteritis nodosa and related condition (Incl. Kawasaki, Churg-Strauss syndrome, etc.) | 446A, 446B                         | M30                                             |
|                                     | Thrombotic microangiopathy                                                                | 446G                               | M31.1                                           |
| <b>Vasculitis</b>                   | Granulomatosis with polyangiitis (Wegeners's granulomatosis)                              | 446E                               | M31.3                                           |
|                                     | Microscopic polyangiitis                                                                  |                                    | M31.7                                           |
|                                     | Giant cell arteritis/ Polymyalgia rheumatica                                              | 446F, 725                          | M35.3, M31.5, M31.6                             |
|                                     | Systemic lupus erythematosus                                                              | 710A                               | M32                                             |
|                                     | Polymyositis/dermatomyositis                                                              | 710E, 710D                         | M33.0, M33.1, M33.2, M33.9                      |
| <b>Connective tissue disorders</b>  | Systematic sclerosis (scleroderma)                                                        | 710B                               | M34                                             |
|                                     | Sjögren's syndrome                                                                        | 710C                               | M35.0                                           |
|                                     | Mixed connective tissue disease                                                           | 710X, 710W                         | M35.1                                           |
|                                     | Behcet's syndrome                                                                         | 136B                               | M35.2                                           |
|                                     | Pemphigus vulgaris                                                                        | 694E                               | L10.0                                           |
|                                     | Bullous pemphigoid                                                                        | 694F                               | L12                                             |
| <b>Disease of skin system</b>       | Dermatitis herpetiformis                                                                  | 694A                               | L13.0                                           |
|                                     | Psoriasis                                                                                 | 696A, 696B                         | L40                                             |
|                                     | Alopecia areata                                                                           | 704A                               | L64                                             |
|                                     | Acute disseminated encephalomyelitis                                                      | -                                  | G04                                             |
| <b>Disease of nervous system</b>    | Anti-NMDA receptor encephalitis                                                           | -                                  | G13.1                                           |
|                                     | Multiple sclerosis                                                                        | 340                                | G35                                             |
|                                     | Neuromyelitis optica and ADEM                                                             | 341A                               | G36                                             |

|                                        |                                  |         |                                                      |
|----------------------------------------|----------------------------------|---------|------------------------------------------------------|
|                                        | Guillain-Barré syndrome          | 357A    | G61.0, G61.1, G61.8, G61.9                           |
|                                        | Myasthenia gravis                | 358A    | G70.0                                                |
|                                        | Primary biliary cirrhosis        | 571G    | K74.3                                                |
| <b>Disease of the digestive system</b> | Crohn's disease                  | 555     | K50                                                  |
|                                        | Ulcerative colitis               | 556     | K51                                                  |
|                                        | Coeliac disease                  | 579A    | K90.0                                                |
|                                        | Acute rheumatic fever and chorea | 390-392 | I00, I01.0, I01.1, I01.2, I01.8, I01.9, I02.0, I02.9 |
| <b>Others</b>                          | Sarcoidosis                      | 135     | D86                                                  |
|                                        | IgA nephropaty                   | 580,582 | N00, N01, N03, N05                                   |

**Table S3** Primary care data READ v2/v3 codes for diagnoses used in this study

|                                 | <b>Primary care V2 code</b>                                                                                                                                                                                                                  | <b>Primary care V3 code</b>                                                                                                                                                                                                                                                                                                                                                                                                                           |
|---------------------------------|----------------------------------------------------------------------------------------------------------------------------------------------------------------------------------------------------------------------------------------------|-------------------------------------------------------------------------------------------------------------------------------------------------------------------------------------------------------------------------------------------------------------------------------------------------------------------------------------------------------------------------------------------------------------------------------------------------------|
| <b>Stress related disorders</b> | E280., E281., E282., E283., E2830, E2831, E283z, E284., E28z., E2900, E2925, E292y, E292z, E293., E2930, E2931, E2932, E293z, E294., E29y., E29y1, E29y2, E29y4, E29yz, E29z., Eu43., Eu430, Eu431, Eu432, Eu433, Eu434, Eu435, Eu43y, Eu43z | 1B1L., 1BE., E280., E281., E282., E283., E2830, E2831, E283z, E284., E29., E290., E290z, E291., E292., E2920, E2921, E2922, E2924, E2925, E292y, E292z, E293., E2930, E2931, E2932, E293z, E294., E29y., E29y0, E29y1, E29y2, E29y3, E29y4, E29y5, E29yz, E29z., Eu430, Eu432, Eu43y, Eu43z, Eu930, Ry15., Ua18k, Ua18L, Ub1T9, X00Sf, X00TT, X40Js, Xa028, Xa18j, Xa18v, XaC2u, XaX55, XaX56, XaX58, XE1Ym, XE1Yn, XE1Yo, XE1Yp, XE2uz, XM0As, XM1Q3 |

**Table S4** Associations between **stress-related disorder PRSs** and the risk of **stress-related disorders** at different p value thresholds\*

| Pt      | Inpatient stress-related disorders |                  |                |                       | Any stress-related disorders |                |                        |
|---------|------------------------------------|------------------|----------------|-----------------------|------------------------------|----------------|------------------------|
|         | N_SNP                              | OR (95% CI)      | R <sup>2</sup> | p value               | OR (95% CI)                  | R <sup>2</sup> | p value                |
| Pt5e-08 | 1                                  | 1.06 (0.99-1.13) | 1.48%          | 0.123                 | 1.00 (0.98-1.03)             | 2.107%         | 0.689                  |
| Pt1e-06 | 5                                  | 1.01 (0.94-1.08) | 1.458%         | 0.792                 | 1.02 (1.00-1.04)             | 2.11%          | 0.085                  |
| Pt1e-04 | 170                                | 1.02 (0.95-1.09) | 1.461%         | 0.559                 | 1.03 (1.01-1.05)             | 2.117%         | 3.3×10 <sup>-3</sup>   |
| Pt0.001 | 1059                               | 1.05 (0.98-1.12) | 1.472%         | 0.200                 | 1.05 (1.03-1.07)             | 2.131%         | 6.04×10 <sup>-6</sup>  |
| Pt0.01  | 6627                               | 1.16 (1.08-1.24) | 1.613%         | 1.77×10 <sup>-5</sup> | 1.08 (1.05-1.10)             | 2.16%          | 2.12×10 <sup>-11</sup> |
| Pt0.05  | 22802                              | 1.18 (1.10-1.26) | 1.643%         | 2.82×10 <sup>-6</sup> | 1.10 (1.07-1.12)             | 2.196%         | 6.39×10 <sup>-18</sup> |
| Pt0.1   | 38527                              | 1.17 (1.09-1.25) | 1.634%         | 5.03×10 <sup>-6</sup> | 1.10 (1.07-1.12)             | 2.194%         | 1.17×10 <sup>-17</sup> |
| Pt0.2   | 63805                              | 1.17 (1.09-1.25) | 1.625%         | 8.9×10 <sup>-6</sup>  | 1.09 (1.07-1.12)             | 2.191%         | 5.02×10 <sup>-17</sup> |
| Pt0.3   | 84551                              | 1.17 (1.09-1.25) | 1.628%         | 7.31×10 <sup>-6</sup> | 1.09 (1.07-1.12)             | 2.188%         | 1.68×10 <sup>-16</sup> |
| Pt0.4   | 102255                             | 1.17 (1.09-1.25) | 1.634%         | 4.93×10 <sup>-6</sup> | 1.09 (1.07-1.12)             | 2.188%         | 1.58×10 <sup>-16</sup> |
| Pt0.5   | 117262                             | 1.17 (1.10-1.25) | 1.634%         | 4.9×10 <sup>-6</sup>  | 1.09 (1.07-1.12)             | 2.187%         | 2.27×10 <sup>-16</sup> |

\*PRS for stress-related disorders was calculated based on **GWAS summary statistics from iPSYCH**.

ORs were adjusted for age, sex, genotyping array, and ancestry principal components.

Pt = p value threshold. N\_SNP = the average number of SNP per individual used in predictive model. R<sup>2</sup> = Nagelkerke's squared (R square).

PRS = polygenic risk score.

**Table S5** Associations between **autoimmune disease PRSs** and the risk of **autoimmune disease** at different p value thresholds\*

| Pt      | N_SNP | OR (95% CI)      | R <sup>2</sup> | p value                 |
|---------|-------|------------------|----------------|-------------------------|
| Pt5e-08 | 13    | 1.16 (1.15-1.18) | 2.843%         | 3.57×10 <sup>-110</sup> |
| Pt1e-06 | 24    | 1.19 (1.17-1.20) | 2.93%          | 1.93×10 <sup>-137</sup> |
| Pt1e-04 | 97    | 1.20 (1.19-1.22) | 3.002%         | 1.35×10 <sup>-160</sup> |
| Pt0.001 | 435   | 1.19 (1.18-1.21) | 2.96%          | 4.89×10 <sup>-147</sup> |
| Pt0.01  | 2350  | 1.19 (1.17-1.20) | 2.928%         | 6.41×10 <sup>-137</sup> |
| Pt0.05  | 7606  | 1.18 (1.16-1.19) | 2.887%         | 8.99×10 <sup>-124</sup> |
| Pt0.1   | 12382 | 1.18 (1.16-1.20) | 2.895%         | 1.93×10 <sup>-126</sup> |
| Pt0.2   | 19740 | 1.18 (1.16-1.19) | 2.891%         | 4.48×10 <sup>-125</sup> |
| Pt0.3   | 25427 | 1.17 (1.16-1.19) | 2.875%         | 7.87×10 <sup>-120</sup> |
| Pt0.4   | 30071 | 1.17 (1.16-1.19) | 2.868%         | 1.14×10 <sup>-117</sup> |
| Pt0.5   | 33856 | 1.17 (1.16-1.19) | 2.865%         | 8.38×10 <sup>-117</sup> |

\* PRSs for **autoimmune diseases** were calculated based on **UK Biobank GWAS data**.

ORs were adjusted for age, sex, genotyping array, and ancestry principal components.

Pt = p value threshold. N\_SNP = the average number of SNP per individual used in predictive model. R<sup>2</sup> = Nagelkerke's squared (R square).

PRS = polygenic risk score.

**Table S6** Associations between **autoimmune thyroid disease** PRSs and the risk of autoimmune thyroid disease at different p value thresholds\*

| Pt      | N_SNP | OR (95% CI)      | R <sup>2</sup> | p value                 |
|---------|-------|------------------|----------------|-------------------------|
| Pt5e-08 | 17    | 1.34 (1.32-1.37) | 6.419%         | 3.53×10 <sup>-202</sup> |
| Pt1e-06 | 34    | 1.38 (1.35-1.40) | 6.608%         | 1.58×10 <sup>-236</sup> |
| Pt1e-04 | 132   | 1.38 (1.36-1.41) | 6.635%         | 3.28×10 <sup>-241</sup> |
| Pt0.001 | 485   | 1.35 (1.33-1.38) | 6.466%         | 4.93×10 <sup>-209</sup> |
| Pt0.01  | 2477  | 1.33 (1.31-1.36) | 6.360%         | 2.82×10 <sup>-189</sup> |
| Pt0.05  | 7729  | 1.30 (1.28-1.33) | 6.206%         | 1.84×10 <sup>-160</sup> |
| Pt0.1   | 12519 | 1.30 (1.27-1.32) | 6.184%         | 1.9×10 <sup>-156</sup>  |
| Pt0.2   | 19781 | 1.29 (1.27-1.32) | 6.160%         | 4.77×10 <sup>-152</sup> |
| Pt0.3   | 25545 | 1.29 (1.27-1.32) | 6.150%         | 4.93×10 <sup>-150</sup> |
| Pt0.4   | 30233 | 1.29 (1.26-1.31) | 6.122%         | 6.2×10 <sup>-145</sup>  |
| Pt0.5   | 33997 | 1.29 (1.26-1.31) | 6.125%         | 2×10 <sup>-145</sup>    |

\* PRSs for **autoimmune thyroid diseases** were calculated based on **UK Biobank GWAS data**.

ORs were adjusted for age, sex, genotyping array, and ancestry principal components.

Pt = p value threshold. N\_SNP = the average number of SNP per individual used in predictive model. R<sup>2</sup> = Nagelkerke's squared (R square).

PRS = polygenic risk score.

**Table S7** Associations between **rheumatoid arthritis** PRSs and the risk of **rheumatoid arthritis** disease at different p value thresholds

| Pt      | GWAS summary statistics from UK Biobank base data |                  |                |                       | Publicly available GWAS summary statistics |                  |                |                        |
|---------|---------------------------------------------------|------------------|----------------|-----------------------|--------------------------------------------|------------------|----------------|------------------------|
|         | N_SNP                                             | OR (95% CI)      | R <sup>2</sup> | p value               | N_SNP                                      | OR (95% CI)      | R <sup>2</sup> | p value                |
| Pt5e-08 | 0                                                 | 1.09 (1.06-1.13) | 2.434%         | 6.53×10 <sup>-8</sup> | 48                                         | 1.19 (1.16-1.21) | 2.724%         | 7.29×10 <sup>-49</sup> |
| Pt1e-06 | 2                                                 | 1.04 (1.01-1.08) | 2.370%         | 0.017                 | 83                                         | 1.22 (1.19-1.24) | 2.813%         | 2.77×10 <sup>-62</sup> |
| Pt1e-04 | 40                                                | 1.04 (1.00-1.07) | 2.365%         | 0.044                 | 268                                        | 1.24 (1.21-1.27) | 2.895%         | 1.19×10 <sup>-73</sup> |
| Pt0.001 | 262                                               | 1.02 (0.99-1.06) | 2.358%         | 0.233                 | 970                                        | 1.25 (1.22-1.28) | 2.905%         | 4.57×10 <sup>-74</sup> |
| Pt0.01  | 1967                                              | 1.03 (1.00-1.06) | 2.362%         | 0.095                 | 5967                                       | 1.20 (1.17-1.23) | 2.745%         | 3.81×10 <sup>-50</sup> |
| Pt0.05  | 7027                                              | 1.06 (1.02-1.10) | 2.387%         | 7.39×10 <sup>-4</sup> | 22071                                      | 1.19 (1.16-1.22) | 2.703%         | 6.36×10 <sup>-44</sup> |
| Pt0.1   | 11845                                             | 1.06 (1.03-1.10) | 2.391%         | 3.49×10 <sup>-4</sup> | 40426                                      | 1.19 (1.16-1.22) | 2.706%         | 2.19×10 <sup>-44</sup> |
| Pt0.2   | 19224                                             | 1.08 (1.05-1.12) | 2.418%         | 2.39×10 <sup>-6</sup> | 68939                                      | 1.18 (1.15-1.21) | 2.679%         | 2.21×10 <sup>-40</sup> |
| Pt0.3   | 25050                                             | 1.09 (1.05-1.12) | 2.421%         | 1.37×10 <sup>-6</sup> | 93099                                      | 1.18 (1.15-1.21) | 2.683%         | 4.81×10 <sup>-41</sup> |
| Pt0.4   | 29774                                             | 1.09 (1.05-1.13) | 2.426%         | 5.97×10 <sup>-7</sup> | 114531                                     | 1.18 (1.15-1.21) | 2.687%         | 1.52×10 <sup>-41</sup> |
| Pt0.5   | 33667                                             | 1.09 (1.05-1.13) | 2.428%         | 4.24×10 <sup>-7</sup> | 132946                                     | 1.17 (1.15-1.20) | 2.668%         | 8.52×10 <sup>-39</sup> |

ORs were adjusted for age, sex, genotyping array, and ancestry principal components.

Pt = p value threshold. N\_SNP = the average number of SNP per individual used in predictive model. R<sup>2</sup> = Nagelkerke's squared (R square).

PRS = polygenic risk score.

**Table S8** Associations between **ulcerative colitis** PRSs and the risk of **ulcerative colitis** at different p value thresholds

| Pt      | GWAS summary statistics from UK Biobank base data |                  |                |                        | Publicly available GWAS summary statistics |                  |                |                         |
|---------|---------------------------------------------------|------------------|----------------|------------------------|--------------------------------------------|------------------|----------------|-------------------------|
|         | N_SNP                                             | OR (95% CI)      | R <sup>2</sup> | p value                | N_SNP                                      | OR (95% CI)      | R <sup>2</sup> | p value                 |
| Pt5e-08 | 1                                                 | 1.18 (1.12-1.23) | 0.562%         | 6.77×10 <sup>-12</sup> | 92                                         | 1.57 (1.52-1.62) | 2.081%         | 2.42×10 <sup>-165</sup> |
| Pt1e-06 | 3                                                 | 1.13 (1.09-1.19) | 0.485%         | 1.51×10 <sup>-8</sup>  | 167                                        | 1.61 (1.56-1.67) | 2.334%         | 6.55×10 <sup>-189</sup> |
| Pt1e-04 | 42                                                | 1.09 (1.04-1.14) | 0.404%         | 1.83×10 <sup>-4</sup>  | 735                                        | 1.60 (1.55-1.66) | 2.278%         | 9.75×10 <sup>-184</sup> |
| Pt0.001 | 303                                               | 1.10 (1.06-1.15) | 0.426%         | 1.52×10 <sup>-5</sup>  | 2892                                       | 1.56 (1.51-1.61) | 2.042%         | 5.11×10 <sup>-162</sup> |
| Pt0.01  | 1979                                              | 1.12 (1.07-1.17) | 0.446%         | 1.65×10 <sup>-6</sup>  | 15290                                      | 1.50 (1.46-1.55) | 1.778%         | 7.81×10 <sup>-138</sup> |
| Pt0.05  | 6985                                              | 1.15 (1.10-1.20) | 0.508%         | 1.66×10 <sup>-9</sup>  | 49750                                      | 1.48 (1.44-1.53) | 1.671%         | 5.31×10 <sup>-128</sup> |
| Pt0.1   | 11689                                             | 1.14 (1.09-1.19) | 0.492%         | 9.69×10 <sup>-9</sup>  | 81953                                      | 1.49 (1.44-1.54) | 1.686%         | 1.9×10 <sup>-129</sup>  |
| Pt0.2   | 19062                                             | 1.16 (1.11-1.21) | 0.531%         | 1.26×10 <sup>-10</sup> | 133502                                     | 1.48 (1.44-1.53) | 1.673%         | 2.11×10 <sup>-128</sup> |
| Pt0.3   | 24921                                             | 1.15 (1.10-1.21) | 0.520%         | 4.09×10 <sup>-10</sup> | 175261                                     | 1.48 (1.43-1.53) | 1.638%         | 3.27×10 <sup>-125</sup> |
| Pt0.4   | 29659                                             | 1.15 (1.10-1.20) | 0.509%         | 1.37×10 <sup>-9</sup>  | 210201                                     | 1.47 (1.43-1.52) | 1.620%         | 1.61×10 <sup>-123</sup> |
| Pt0.5   | 33520                                             | 1.15 (1.10-1.20) | 0.510%         | 1.29×10 <sup>-9</sup>  | 240047                                     | 1.47 (1.43-1.52) | 1.617%         | 3.12×10 <sup>-123</sup> |

ORs were adjusted for age, sex, genotyping array, and ancestry principal components.

Pt = p value threshold. N\_SNP = the average number of SNP per individual used in predictive model. R<sup>2</sup> = Nagelkerke's squared (R square).

PRS = polygenic risk score.

**Table S9** Associations between **psoriasis** PRSs and the risk of **psoriasis** at different p value thresholds\*

| Pt      | N_SNP | OR (95% CI)      | R <sup>2</sup> | p value                |
|---------|-------|------------------|----------------|------------------------|
| Pt5e-08 | 1     | 1.19 (1.14-1.24) | 0.704%         | 3.65×10 <sup>-16</sup> |
| Pt1e-06 | 3     | 1.21 (1.16-1.26) | 0.750%         | 2.8×10 <sup>-18</sup>  |
| Pt1e-04 | 41    | 1.18 (1.13-1.23) | 0.659%         | 2.24×10 <sup>-13</sup> |
| Pt0.001 | 282   | 1.12 (1.07-1.17) | 0.527%         | 6.05×10 <sup>-7</sup>  |
| Pt0.01  | 1895  | 1.10 (1.05-1.15) | 0.497%         | 1.77×10 <sup>-5</sup>  |
| Pt0.05  | 6846  | 1.09 (1.05-1.14) | 0.484%         | 8.46×10 <sup>-5</sup>  |
| Pt0.1   | 11542 | 1.11 (1.06-1.16) | 0.504%         | 7.9×10 <sup>-6</sup>   |
| Pt0.2   | 19027 | 1.10 (1.05-1.15) | 0.492%         | 3.29×10 <sup>-5</sup>  |
| Pt0.3   | 24841 | 1.11 (1.06-1.16) | 0.505%         | 7.66×10 <sup>-6</sup>  |
| Pt0.4   | 29561 | 1.10 (1.06-1.16) | 0.501%         | 1.23×10 <sup>-5</sup>  |
| Pt0.5   | 33431 | 1.10 (1.05-1.15) | 0.498%         | 1.64×10 <sup>-5</sup>  |

\* PRSs for **psoriasis** were calculated based on **UK Biobank GWAS data**.

ORs were adjusted for age, sex, genotyping array, and ancestry principal components.

Pt = p value threshold. N\_SNP = the average number of SNP per individual used in predictive model. R<sup>2</sup> = Nagelkerke's squared (R square).

PRS = polygenic risk score.

**Table S10** Associations between **diabetes mellitus - insulin dependent** PRSs and the risk of **diabetes mellitus - insulin dependent** at different p value thresholds

| Pt      | GWAS summary statistics from UK Biobank base data |                  |                |                        | Publicly available GWAS summary statistics |                  |                |                        |
|---------|---------------------------------------------------|------------------|----------------|------------------------|--------------------------------------------|------------------|----------------|------------------------|
|         | N_SNP                                             | OR (95% CI)      | R <sup>2</sup> | p value                | N_SNP                                      | OR (95% CI)      | R <sup>2</sup> | p value                |
| Pt5e-08 | 1                                                 | 1.20 (1.14-1.26) | 1.383%         | 1.86×10 <sup>-13</sup> | 24                                         | 1.21 (1.17-1.25) | 1.523%         | 1.39×10 <sup>-29</sup> |
| Pt1e-06 | 2                                                 | 1.10 (1.05-1.15) | 1.177%         | 1.29×10 <sup>-4</sup>  | 34                                         | 1.22 (1.18-1.26) | 1.539%         | 6.16×10 <sup>-31</sup> |
| Pt1e-04 | 39                                                | 1.10 (1.05-1.16) | 1.187%         | 4.78×10 <sup>-5</sup>  | 165                                        | 1.22 (1.18-1.26) | 1.540%         | 8.99×10 <sup>-31</sup> |
| Pt0.001 | 270                                               | 1.07 (1.02-1.12) | 1.142%         | 5.63×10 <sup>-3</sup>  | 634                                        | 1.18 (1.14-1.22) | 1.422%         | 7.9×10 <sup>-21</sup>  |
| Pt0.01  | 1845                                              | 1.17 (1.11-1.23) | 1.313%         | 1.45×10 <sup>-10</sup> | 2950                                       | 1.16 (1.12-1.20) | 1.379%         | 3.2×10 <sup>-17</sup>  |
| Pt0.05  | 6841                                              | 1.16 (1.11-1.22) | 1.298%         | 6.56×10 <sup>-10</sup> | 9009                                       | 1.16 (1.12-1.20) | 1.387%         | 7.13×10 <sup>-18</sup> |
| Pt0.1   | 11576                                             | 1.16 (1.11-1.22) | 1.291%         | 1.28×10 <sup>-9</sup>  | 14284                                      | 1.16 (1.12-1.20) | 1.383%         | 1.48×10 <sup>-17</sup> |
| Pt0.2   | 19099                                             | 1.16 (1.10-1.21) | 1.282%         | 3.13×10 <sup>-9</sup>  | 22203                                      | 1.16 (1.12-1.20) | 1.372%         | 1.32×10 <sup>-16</sup> |
| Pt0.3   | 24929                                             | 1.15 (1.10-1.21) | 1.270%         | 1.07×10 <sup>-8</sup>  | 28620                                      | 1.15 (1.11-1.19) | 1.363%         | 7.49×10 <sup>-16</sup> |
| Pt0.4   | 29670                                             | 1.15 (1.09-1.20) | 1.264%         | 2.04×10 <sup>-8</sup>  | 33716                                      | 1.15 (1.11-1.19) | 1.362%         | 8.64×10 <sup>-16</sup> |
| Pt0.5   | 33598                                             | 1.14 (1.09-1.20) | 1.259%         | 3.19×10 <sup>-8</sup>  | 37907                                      | 1.15 (1.11-1.19) | 1.355%         | 3.27×10 <sup>-15</sup> |

ORs were adjusted for age, sex, genotyping array, and ancestry principal components.

Pt = p value threshold. N\_SNP = the average number of SNP per individual used in predictive model. R<sup>2</sup> = Nagelkerke's squared (R square).

PRS = polygenic risk score.

**Table S11** Associations between **giant cell arteritis** PRSs and the risk of **giant cell arteritis** at different p value thresholds\*

| Pt      | N_SNP | OR (95% CI)      | R <sup>2</sup> | p value               |
|---------|-------|------------------|----------------|-----------------------|
| Pt5e-08 | 0     | 0.99 (0.95-1.04) | 6.821%         | 0.79                  |
| Pt1e-06 | 1     | 1.03 (0.99-1.08) | 6.831%         | 0.17                  |
| Pt1e-04 | 29    | 1.03 (0.98-1.08) | 6.829%         | 0.205                 |
| Pt0.001 | 254   | 1.04 (0.99-1.09) | 6.833%         | 0.132                 |
| Pt0.01  | 1824  | 1.05 (1.00-1.10) | 6.842%         | 0.045                 |
| Pt0.05  | 6791  | 1.07 (1.02-1.12) | 6.857%         | 8.38×10 <sup>-3</sup> |
| Pt0.1   | 11585 | 1.08 (1.03-1.13) | 6.870%         | 1.96×10 <sup>-3</sup> |
| Pt0.2   | 19061 | 1.06 (1.01-1.12) | 6.853%         | 0.012                 |
| Pt0.3   | 24888 | 1.06 (1.01-1.12) | 6.853%         | 0.012                 |
| Pt0.4   | 29704 | 1.06 (1.01-1.11) | 6.848%         | 0.022                 |
| Pt0.5   | 33647 | 1.06 (1.01-1.11) | 6.850%         | 0.017                 |

\* PRSs for **giant cell arteritis** were calculated based on **UK Biobank GWAS data**.

ORs were adjusted for age, sex, genotyping array, and ancestry principal components.

Pt = p value threshold. N\_SNP = the average number of SNP per individual used in predictive model. R<sup>2</sup> = Nagelkerke's squared (R square).

PRS = polygenic risk score.

**Table S12** Consistency of variants<sup>a</sup> associated with autoimmune thyroid disease between UK Biobank GWAS data and publicly available GWAS data

| SNP        | CHR | BP        | A1 | A2 | Public GWAS* |           | UK Biobank GWAS |                  |
|------------|-----|-----------|----|----|--------------|-----------|-----------------|------------------|
|            |     |           |    |    | OR           | P         | OR              | P <sup>b</sup>   |
| rs2476601  | 1   | 114377568 | A  | G  | 1.44         | 2.20E-160 | 1.39            | <b>1.55E-109</b> |
| rs3184504  | 12  | 111884608 | T  | C  | 1.23         | 9.40E-116 | 1.19            | <b>8.25E-68</b>  |
| rs925489   | 9   | 100546600 | C  | T  | 0.81         | 8.50E-110 | 0.82            | <b>7.26E-77</b>  |
| rs231775   | 2   | 204732714 | G  | A  | 1.18         | 1.60E-74  | 1.17            | <b>6.22E-55</b>  |
| rs654537   | 6   | 90990050  | G  | A  | 0.88         | 6.10E-42  | 0.89            | <b>7.18E-28</b>  |
| rs7568275  | 2   | 191966452 | G  | C  | 1.15         | 4.50E-39  | 1.14            | <b>6.55E-31</b>  |
| rs2757041  | 6   | 167370532 | G  | C  | 0.88         | 1.70E-37  | 0.90            | <b>4.36E-24</b>  |
| rs4409785  | 11  | 95311422  | C  | T  | 1.15         | 5.30E-31  | 1.14            | <b>9.95E-25</b>  |
| rs229527   | 22  | 37581485  | A  | C  | 1.11         | 2.90E-30  | 1.10            | <b>2.76E-21</b>  |
| rs6535628  | 4   | 149634038 | G  | A  | 0.88         | 6.40E-30  | 0.88            | <b>1.80E-23</b>  |
| rs7090530  | 10  | 6110875   | C  | A  | 0.91         | 2.00E-26  | 0.91            | <b>2.61E-18</b>  |
| rs3764022  | 12  | 9833524   | G  | C  | 0.91         | 2.20E-24  | 0.92            | <b>1.49E-13</b>  |
| rs76428106 | 13  | 28604007  | C  | T  | 1.46         | 2.40E-24  | 1.41            | <b>8.76E-16</b>  |
| rs17364832 | 13  | 24786915  | G  | T  | 1.10         | 2.10E-23  | 1.09            | <b>1.41E-15</b>  |
| rs11675342 | 2   | 1407628   | T  | C  | 1.09         | 1.40E-21  | 1.08            | <b>9.86E-14</b>  |
| rs1534430  | 2   | 12644736  | T  | C  | 0.92         | 3.10E-20  | 0.93            | <b>6.35E-13</b>  |
| rs4293777  | 4   | 10716939  | C  | G  | 1.08         | 2.30E-19  | 1.06            | <b>4.80E-10</b>  |
| rs7173565  | 15  | 38850330  | C  | T  | 1.09         | 9.40E-18  | 1.09            | <b>4.03E-15</b>  |
| rs2445610  | 8   | 128197088 | G  | A  | 0.93         | 1.30E-15  | 0.93            | <b>3.37E-13</b>  |
| rs11079788 | 17  | 45820723  | T  | C  | 1.09         | 2.70E-15  | 1.08            | <b>9.26E-10</b>  |
| rs12582330 | 12  | 103892941 | G  | T  | 1.08         | 7.70E-15  | 1.06            | <b>2.50E-08</b>  |
| rs7441808  | 4   | 26090375  | G  | A  | 1.08         | 9.80E-15  | 1.07            | <b>3.97E-09</b>  |
| rs9533118  | 13  | 43047260  | G  | A  | 0.93         | 9.90E-15  | 0.94            | <b>1.10E-08</b>  |
| rs1990760  | 2   | 163124051 | C  | T  | 0.93         | 1.10E-14  | 0.94            | <b>6.58E-09</b>  |
| rs244688   | 5   | 133423495 | T  | C  | 1.11         | 1.10E-13  | 1.09            | <b>9.37E-10</b>  |
| rs6457834  | 6   | 35536195  | C  | A  | 0.93         | 6.00E-13  | 0.95            | 2.13E-07         |
| rs35667974 | 2   | 163124637 | C  | T  | 0.79         | 8.80E-13  | 0.85            | 4.02E-06         |
| rs2069556  | 8   | 133920518 | A  | G  | 1.07         | 1.40E-12  | 1.06            | <b>2.35E-09</b>  |
| rs2745803  | 20  | 17859706  | G  | A  | 0.92         | 1.60E-12  | 0.93            | <b>1.80E-08</b>  |
| rs6867654  | 5   | 76543768  | A  | G  | 1.07         | 2.90E-12  | 1.07            | <b>2.47E-11</b>  |
| rs9494389  | 6   | 136115507 | C  | T  | 1.07         | 9.50E-12  | 1.05            | 1.35E-06         |
| rs9878908  | 3   | 12302462  | C  | T  | 1.08         | 9.90E-12  | 1.05            | 3.61E-05         |
| rs6505765  | 18  | 12782849  | G  | C  | 1.07         | 1.90E-11  | 1.06            | <b>3.65E-09</b>  |
| rs2271194  | 12  | 56477694  | A  | T  | 1.06         | 2.00E-11  | 1.05            | 3.45E-07         |
| rs2234167  | 1   | 2494330   | A  | G  | 1.09         | 2.10E-11  | 1.08            | 2.01E-07         |
| rs7251     | 19  | 50162909  | G  | C  | 0.94         | 3.70E-11  | 0.93            | <b>1.30E-10</b>  |
| rs12697352 | 5   | 35837234  | A  | G  | 0.94         | 3.90E-11  | 0.95            | 2.07E-07         |
| rs3784099  | 14  | 68749927  | A  | G  | 0.94         | 3.90E-11  | 0.95            | 1.37E-05         |
| rs1991797  | 5   | 102622453 | T  | G  | 0.94         | 4.60E-11  | 0.93            | <b>6.04E-11</b>  |
| rs763361   | 18  | 67531642  | T  | C  | 1.06         | 5.10E-11  | 1.05            | 1.73E-07         |
| rs2823272  | 21  | 16798586  | A  | T  | 0.94         | 5.70E-11  | 0.95            | 2.45E-06         |
| rs11720041 | 3   | 39320000  | T  | C  | 1.08         | 9.70E-11  | 1.07            | 1.73E-06         |



|            |    |           |   |   |      |          |      |                 |
|------------|----|-----------|---|---|------|----------|------|-----------------|
| rs11898293 | 2  | 160552593 | C | T | 0.94 | 1.30E-10 | 0.94 | <b>8.94E-09</b> |
| rs61776678 | 1  | 38377021  | A | G | 0.94 | 1.50E-10 | 0.94 | <b>1.60E-09</b> |
| rs7218886  | 17 | 8841140   | G | T | 0.92 | 4.40E-10 | 0.93 | 2.04E-07        |
| rs12114596 | 8  | 61518399  | T | C | 1.06 | 4.90E-10 | 1.05 | 6.56E-06        |
| rs7428218  | 3  | 5015894   | C | T | 1.08 | 6.30E-10 | 1.08 | <b>1.70E-08</b> |
| rs221796   | 7  | 100284913 | C | G | 0.92 | 7.40E-10 | 0.92 | 3.92E-07        |
| rs7758816  | 6  | 112098896 | C | T | 0.95 | 7.90E-10 | 0.95 | 6.70E-07        |
| rs1045216  | 10 | 124189197 | A | G | 0.95 | 8.30E-10 | 0.96 | 2.33E-05        |
| rs1561924  | 8  | 129569371 | A | G | 0.92 | 9.20E-10 | 0.92 | <b>2.07E-08</b> |
| rs607404   | 18 | 23598160  | T | A | 0.94 | 1.00E-09 | 0.95 | 8.42E-07        |
| rs12756886 | 1  | 200840467 | C | T | 1.08 | 3.10E-09 | 1.07 | 2.65E-06        |
| rs1079418  | 6  | 166047034 | G | A | 0.94 | 3.60E-09 | 0.94 | 8.58E-08        |
| rs7594497  | 2  | 55872538  | C | T | 1.12 | 4.10E-09 | 1.11 | 7.96E-07        |
| rs12793348 | 11 | 93913036  | G | A | 0.90 | 5.30E-09 | 0.92 | 2.68E-05        |
| rs35677470 | 3  | 58183636  | A | G | 1.10 | 8.90E-09 | 1.08 | 1.22E-05        |
| rs2681417  | 3  | 121825197 | G | A | 1.10 | 3.30E-08 | 1.08 | 3.25E-05        |

<sup>a</sup> Variants in both public GWAS and UK Biobank GWAS. We confirmed 38 variants in 58 significant SNPs of previously published autoimmune thyroid disease GWAS (overlaps of top SNPs=60.34%).

<sup>b</sup> P value in UK Biobank GWAS reached significant threshold (i.e.  $P < 5E-8$ ) was set **bold**.

\*Publicly available GWAS data for autoimmune thyroid disease include UK Biobank samples

GWAS= genome-wide association studies. SNP = single-nucleotide polymorphism. CHR = chromosome. BP = base position. A1 = risk allele.

A2 = reference allele. OR = odds ratio.

**Table S13** Consistency of variants<sup>a</sup> associated with rheumatoid arthritis between UK Biobank GWAS data and publicly available GWAS data

| SNP        | CHR | BP        | A1 | A2 | Public GWAS |           | UK Biobank GWAS |                 |
|------------|-----|-----------|----|----|-------------|-----------|-----------------|-----------------|
|            |     |           |    |    | OR          | P         | OR              | P <sup>b</sup>  |
| rs9268839  | 6   | 32428772  | G  | A  | 2.50        | 1.00E-250 | 1.35            | <b>4.86E-66</b> |
| rs2476601  | 1   | 114377568 | A  | G  | 1.81        | 1.60E-149 | 1.25            | <b>1.17E-16</b> |
| rs7731626  | 5   | 55444683  | A  | G  | 0.82        | 7.90E-23  | 0.90            | <b>1.09E-08</b> |
| rs3087243  | 2   | 204738919 | A  | G  | 0.87        | 9.20E-20  | 0.97            | 6.46E-02        |
| rs17264332 | 6   | 138005515 | G  | A  | 1.18        | 7.10E-19  | 1.07            | 5.60E-04        |
| rs7752903  | 6   | 138227364 | G  | T  | 1.41        | 1.40E-17  | 1.06            | 2.27E-01        |
| rs8026898  | 15  | 69991417  | A  | G  | 1.16        | 2.40E-17  | 1.08            | 8.15E-05        |
| rs11933540 | 4   | 26120001  | C  | T  | 1.15        | 9.20E-17  | 1.05            | 1.58E-02        |
| rs10790268 | 11  | 118729391 | A  | G  | 0.85        | 3.30E-15  | 0.96            | 1.03E-01        |
| rs1571878  | 6   | 167540842 | C  | T  | 1.12        | 4.90E-15  | 1.03            | 7.58E-02        |
| rs34695944 | 2   | 61124850  | C  | T  | 1.12        | 4.40E-14  | 1.02            | 3.93E-01        |
| rs11574914 | 9   | 34710338  | A  | G  | 1.13        | 1.50E-13  | 1.00            | 9.26E-01        |
| rs8032939  | 15  | 38834033  | C  | T  | 1.12        | 2.40E-12  | 1.06            | 5.98E-03        |
| rs9653442  | 2   | 100825367 | C  | T  | 1.11        | 3.60E-12  | 1.05            | 7.91E-03        |
| rs11889341 | 2   | 191943742 | T  | C  | 1.13        | 6.50E-12  | 1.09            | 1.68E-05        |
| rs706778   | 10  | 6098949   | T  | C  | 1.11        | 7.10E-12  | 1.04            | 2.02E-02        |
| rs1980422  | 2   | 204610396 | C  | T  | 1.12        | 6.00E-11  | 1.06            | 7.88E-03        |
| rs9603616  | 13  | 40368069  | T  | C  | 0.90        | 8.40E-11  | 0.95            | 8.64E-03        |
| rs4452313  | 3   | 17047032  | T  | A  | 1.11        | 2.70E-10  | 1.03            | 1.79E-01        |
| rs909685   | 22  | 39747671  | A  | T  | 1.11        | 3.10E-10  | 1.05            | 6.44E-03        |
| rs2561477  | 5   | 102608924 | A  | G  | 0.90        | 5.20E-10  | 0.96            | 4.43E-02        |
| rs1858037  | 2   | 65598300  | A  | T  | 0.90        | 5.90E-10  | 0.96            | 2.39E-02        |
| rs2451258  | 6   | 159506600 | C  | T  | 0.90        | 6.60E-10  | 1.00            | 9.04E-01        |
| rs947474   | 10  | 6390450   | G  | A  | 0.88        | 2.80E-09  | 0.94            | 9.19E-03        |
| rs28411352 | 1   | 38278579  | T  | C  | 1.11        | 5.20E-09  | 1.02            | 3.47E-01        |
| rs2301888  | 1   | 17672730  | A  | G  | 0.90        | 5.50E-09  | 0.97            | 7.95E-02        |
| rs2105325  | 1   | 173349725 | A  | C  | 0.90        | 1.00E-08  | 0.97            | 8.95E-02        |
| rs2233424  | 6   | 44233921  | T  | C  | 1.33        | 3.30E-08  | 1.07            | 9.20E-02        |
| rs2234067  | 6   | 36355654  | A  | C  | 0.88        | 4.10E-08  | 0.97            | 1.83E-01        |
| rs624988   | 1   | 117263790 | T  | C  | 1.09        | 4.60E-08  | 1.04            | 1.55E-02        |

<sup>a</sup> Variants in both public GWAS and UK Biobank GWAS. We confirmed 3 variants in 30 significant SNPs of previously published rheumatoid arthritis GWAS (overlaps of top SNPs=10%).

<sup>b</sup> P value in UK Biobank GWAS reached significant threshold (i.e.  $P < 5 \times 10^{-8}$ ) was set **bold**.

GWAS= genome-wide association studies. SNP = single-nucleotide polymorphism. CHR = chromosome. BP = base position. A1 = risk allele. A2 = reference allele. OR = odds ratio.

**Table S14** Consistency of variants<sup>a</sup> associated with ulcerative colitis between UK Biobank GWAS data and publicly available GWAS data

| SNP         | CHR | BP        | A1 | A2 | Public GWAS |           | UK Biobank GWAS |                 |
|-------------|-----|-----------|----|----|-------------|-----------|-----------------|-----------------|
|             |     |           |    |    | OR          | P         | OR              | P <sup>b</sup>  |
| rs6426833   | 1   | 20171860  | G  | A  | 0.80        | 3.035E-42 | 0.85            | <b>6.57E-12</b> |
| rs11581607  | 1   | 67707690  | A  | G  | 0.62        | 3.539E-41 | 0.70            | <b>7.39E-11</b> |
| rs2836878   | 21  | 40465534  | A  | G  | 0.80        | 1.834E-32 | 0.80            | <b>1.55E-16</b> |
| rs6017342   | 20  | 43065028  | A  | C  | 0.82        | 3.952E-30 | 0.87            | <b>1.77E-09</b> |
| rs3024505   | 1   | 206939904 | A  | G  | 1.23        | 1.525E-23 | 1.14            | 2.60E-05        |
| rs7608910   | 2   | 61204856  | G  | A  | 1.17        | 4.345E-23 | 1.08            | 6.03E-04        |
| rs4409764   | 10  | 101284237 | T  | G  | 1.16        | 2.485E-21 | 1.12            | 6.42E-07        |
| rs3197999   | 3   | 49721532  | A  | G  | 1.17        | 8.398E-20 | 1.08            | 3.71E-03        |
| rs1801274   | 1   | 161479745 | A  | G  | 1.15        | 1.515E-18 | 1.17            | <b>1.17E-11</b> |
| rs6062496   | 20  | 62329099  | G  | A  | 0.87        | 8.966E-17 | 0.91            | 6.90E-05        |
| rs12946510  | 17  | 37912377  | T  | C  | 1.14        | 1.523E-16 | 1.08            | 1.03E-03        |
| rs10781499  | 9   | 139266405 | A  | G  | 1.14        | 2.071E-16 | 1.08            | 4.99E-04        |
| rs7554511   | 1   | 200877562 | A  | C  | 0.87        | 4.267E-16 | 0.90            | 2.17E-05        |
| rs10761659  | 10  | 64445564  | A  | G  | 0.88        | 1.327E-15 | 0.91            | 7.72E-05        |
| rs12568930  | 1   | 22702231  | C  | T  | 0.84        | 1.602E-15 | 0.90            | 1.31E-03        |
| rs6920220   | 6   | 138006504 | A  | G  | 1.16        | 2.891E-15 | 1.16            | 5.15E-08        |
| rs11236797  | 11  | 76299649  | A  | C  | 1.13        | 5.268E-15 | 1.10            | 1.90E-05        |
| rs17085007  | 13  | 27531267  | C  | T  | 1.17        | 1.21E-14  | 1.16            | 4.11E-07        |
| rs2823286   | 21  | 16817938  | A  | G  | 0.88        | 1.591E-13 | 0.91            | 4.16E-04        |
| rs2816958   | 1   | 200101920 | A  | G  | 0.83        | 2E-13     | 0.78            | <b>1.15E-09</b> |
| rs7282490   | 21  | 45615741  | G  | A  | 1.12        | 5.331E-13 | 1.11            | 1.76E-05        |
| rs798502    | 7   | 2789880   | C  | A  | 0.89        | 3.895E-11 | 0.94            | 2.49E-02        |
| rs12942547  | 17  | 40527544  | G  | A  | 0.90        | 1.203E-10 | 0.93            | 1.71E-03        |
| rs10797432  | 1   | 2501338   | T  | C  | 0.90        | 1.203E-10 | 0.95            | 1.62E-02        |
| rs5771069   | 22  | 50435480  | G  | A  | 1.10        | 2.472E-10 | 1.06            | 7.25E-03        |
| rs16940202  | 16  | 86014241  | C  | T  | 1.14        | 3.073E-10 | 1.07            | 3.08E-02        |
| rs2413583   | 22  | 39659773  | T  | C  | 1.15        | 3.149E-10 | 0.90            | 8.83E-04        |
| rs4728142   | 7   | 128573967 | A  | G  | 1.10        | 3.232E-10 | 1.08            | 1.14E-03        |
| rs3851228   | 6   | 111848191 | T  | A  | 1.21        | 5.927E-10 | 1.11            | 2.56E-02        |
| rs3766606   | 1   | 8022197   | T  | G  | 0.88        | 3.941E-09 | 0.99            | 7.75E-01        |
| rs1811711   | 2   | 228670476 | G  | C  | 0.88        | 6.086E-09 | 0.89            | 6.89E-05        |
| rs113986290 | 6   | 19781009  | T  | C  | 0.74        | 7.593E-09 | 0.74            | 6.18E-04        |
| rs17656349  | 5   | 149605994 | C  | T  | 0.91        | 1.54E-08  | 0.97            | 1.74E-01        |
| rs7911117   | 10  | 27179596  | G  | T  | 0.87        | 1.838E-08 | 1.01            | 7.97E-01        |
| rs17293632  | 15  | 67442596  | T  | C  | 1.11        | 2.107E-08 | 1.07            | 1.03E-02        |
| rs254560    | 5   | 134443606 | A  | G  | 1.09        | 2.624E-08 | 1.08            | 1.33E-03        |
| rs138788    | 22  | 35729721  | G  | A  | 0.91        | 2.949E-08 | 0.95            | 4.85E-02        |
| rs1728785   | 16  | 68591230  | A  | C  | 0.90        | 3.762E-08 | 0.97            | 2.73E-01        |
| rs4976646   | 5   | 176788570 | C  | T  | 1.10        | 4.483E-08 | 1.04            | 1.51E-01        |

<sup>a</sup> Variants in both public GWAS and UK Biobank GWAS. We confirmed 6 variants in 39 significant SNPs of previously published ulcerative colitis GWAS (overlaps of top SNPs=15.35%).

<sup>b</sup> P value in UK Biobank GWAS reached significant threshold (i.e. P<5E-8) was set **bold**.

GWAS= genome-wide association studies. SNP = single-nucleotide polymorphism. CHR = chromosome. BP = base position. A1 = risk allele. A2 = reference allele. OR = odds ratio.

**Table S15** Consistency of variants<sup>a</sup> associated with diabetes mellitus - insulin dependent between UK Biobank GWAS data and publicly available GWAS data

| SNP        | CHR | BP        | A1 | A2 | Public GWAS |          | UK Biobank GWAS |                 |
|------------|-----|-----------|----|----|-------------|----------|-----------------|-----------------|
|            |     |           |    |    | OR          | P        | OR              | P <sup>b</sup>  |
| rs6679677  | 1   | 114303808 | A  | C  | 2.00        | 1.00E-74 | 1.38            | <b>7.98E-19</b> |
| rs12722496 | 10  | 6096667   | G  | A  | 0.65        | 2.41E-23 | 0.81            | 8.94E-07        |
| rs7297175  | 12  | 56473808  | T  | C  | 1.28        | 7.57E-23 | 1.07            | 5.62E-03        |
| rs3087243  | 2   | 204738919 | A  | G  | 0.84        | 1.08E-12 | 0.93            | 5.70E-03        |
| rs7020673  | 9   | 4291747   | C  | G  | 0.86        | 3.22E-09 | 0.98            | 4.19E-01        |
| rs10230978 | 7   | 50477144  | A  | G  | 0.86        | 3.80E-08 | 1.02            | 3.87E-01        |
| rs2269246  | 1   | 64107491  | C  | T  | 1.18        | 4.99E-08 | 0.98            | 5.31E-01        |

<sup>a</sup> Variants in both public GWAS and UK Biobank GWAS. We confirmed 1 variant in 5 significant SNPs of previously published diabetes mellitus - insulin dependent GWAS (overlaps of top SNPs=20%)

<sup>b</sup> P value in UK Biobank GWAS reached significant threshold (i.e. P<5E-8) was set **bold**.

GWAS= genome-wide association studies. SNP = single-nucleotide polymorphism. CHR = chromosome. BP = base position. A1 = risk allele. A2 = reference allele. OR = odds ratio.

**Table S16** The proportions of specific subtypes of stress-related disorders in database

| Subtype of stress-related disorders           | Based on diagnoses in the Swedish Patient Register | Based on diagnoses in UK Biobank inpatient hospital and primary care data | Based on diagnoses in the UK Biobank inpatient hospital data |
|-----------------------------------------------|----------------------------------------------------|---------------------------------------------------------------------------|--------------------------------------------------------------|
| Posttraumatic stress disorder                 | 6.20%                                              | 7.50%                                                                     | 41.66%                                                       |
| Acute stress reaction                         | 43.90%                                             | 12.03%                                                                    | 15.36%                                                       |
| Adjustment disorder and other stress reaction | 49.90%                                             | 80.48%                                                                    | 42.98%                                                       |

**Table S17** Genetic associations between stress-related disorders and autoimmune disease (PRS based on publicly available GWAS data)

| Disease                               | PRS for stress-related disorder <sup>a</sup> and risk of autoimmune disease |           |                        | PRS for autoimmune disease <sup>b</sup> and risk of any stress-related disorder |           |                       | PRS for autoimmune disease <sup>b</sup> and risk of inpatient stress-related disorder |           |       |
|---------------------------------------|-----------------------------------------------------------------------------|-----------|------------------------|---------------------------------------------------------------------------------|-----------|-----------------------|---------------------------------------------------------------------------------------|-----------|-------|
|                                       | OR <sup>c</sup>                                                             | 95% CI    | P                      | OR <sup>c</sup>                                                                 | 95% CI    | P                     | OR <sup>c</sup>                                                                       | 95% CI    | P     |
| Autoimmune disease                    | 1.05                                                                        | 1.04-1.06 | 3.23×10 <sup>-24</sup> | -                                                                               | -         | -                     | -                                                                                     | -         | -     |
| <i>Specific disease types</i>         |                                                                             |           |                        |                                                                                 |           |                       |                                                                                       |           |       |
| Autoimmune thyroid disease*           | 1.05                                                                        | 1.03-1.06 | 1.37×10 <sup>-11</sup> | -                                                                               | -         | -                     | -                                                                                     | -         | -     |
| Rheumatoid arthritis                  | 1.06                                                                        | 1.03-1.09 | 2.07×10 <sup>-6</sup>  | 1.02                                                                            | 1.00-1.04 | 0.047                 | 0.98                                                                                  | 0.91-1.04 | 0.989 |
| Ulcerative colitis                    | 1.03                                                                        | 1.00-1.07 | 0.051                  | 1.07                                                                            | 1.04-1.09 | 3.11×10 <sup>-9</sup> | 0.94                                                                                  | 0.88-1.01 | 0.7   |
| Psoriasis                             | 1.06                                                                        | 1.02-1.09 | 1.07×10 <sup>-3</sup>  | -                                                                               | -         | -                     | -                                                                                     | -         | -     |
| Diabetes mellitus - insulin dependent | 1.08                                                                        | 1.04-1.12 | 1.52×10 <sup>-5</sup>  | 1.03                                                                            | 1.00-1.05 | 0.018                 | 0.97                                                                                  | 0.90-1.04 | 0.327 |
| Giant cell arteritis                  | 1.05                                                                        | 1.02-1.09 | 2.75×10 <sup>-3</sup>  | -                                                                               | -         | -                     | -                                                                                     | -         | -     |

<sup>a</sup> PRS for stress-related disorders was calculated based on **GWAS summary statistics from iPSYCH**.

<sup>b</sup> PRS for specific autoimmune disease was calculated based on **publicly available GWAS summary statistics**

<sup>c</sup> ORs and 95% CIs (per standard deviation increase in the corresponding PRS) were estimated by logistic regression models, adjusted for age, sex, genotyping array, and ancestry principal components.

\*Publicly available GWAS data for autoimmune thyroid disease include UK Biobank samples, therefore it was not used for PRS calculation.

OR = odds ratio. P = P value. PRS = polygenic risk score. - = no publicly available GWAS summary statistics

**Table S18** Top three pathways of the corresponding shared MCODE components between **stress-related disorder** and **autoimmune diseases** based on protein-protein interaction enrichment analyses

| Biological Functions              | Enriched terms | Description                                                       | P value  | q-value <sup>a</sup> |
|-----------------------------------|----------------|-------------------------------------------------------------------|----------|----------------------|
| Signaling by G proteins/ GPCR     | R-HSA-418594   | G alpha (i) signalling events                                     | 2.51E-33 | 1.00E-29             |
|                                   | R-HSA-500792   | GPCR ligand binding                                               | 2.00E-30 | 1.00E-27             |
|                                   | R-HSA-388396   | GPCR downstream signalling                                        | 3.98E-28 | 1.00E-25             |
| Cilium Assembly                   | R-HSA-5620924  | Intraflagellar transport                                          | 2.00E-11 | 1.00E-12             |
|                                   | R-HSA-1852241  | Organelle biogenesis and maintenance                              | 1.26E-09 | 1.00E-12             |
|                                   | R-HSA-5617833  | Cilium Assembly                                                   | 1.58E-08 | 1.00E-12             |
| Membrane Trafficking              | R-HSA-199991   | Membrane Trafficking                                              | 1.00E-05 | 2.00E-04             |
|                                   | R-HSA-5653656  | Vesicle-mediated transport                                        | 1.00E-05 | 2.51E-04             |
| Eukaryotic Translation Initiation |                | L13a-mediated translational silencing of Ceruloplasmin expression | 2.51E-14 | 1.00E-12             |
|                                   | R-HSA-156827   |                                                                   | 2.51E-14 | 1.00E-12             |
|                                   | R-HSA-72706    | GTP hydrolysis and joining of the 60S ribosomal subunit           | 2.51E-14 | 1.00E-12             |
| Cell cycle                        | R-HSA-72737    | Cap-dependent Translation Initiation                              | 3.98E-14 | 1.00E-12             |
|                                   | R-HSA-380287   | Centrosome maturation                                             | 1.00E-19 | 1.00E-17             |
|                                   | R-HSA-380270   | Recruitment of mitotic centrosome proteins and complexes          | 1.00E-19 | 1.00E-17             |
|                                   | R-HSA-5620912  | Anchoring of the basal body to the plasma membrane                | 3.98E-19 | 1.00E-16             |

<sup>a</sup> The q-value were calculated using the Benjamini-Hochberg procedure to account for multiple testing.

MCODE =Molecular Complex Detection algorithm.

**Table S19** Top three pathways of the corresponding shared MCODE components between **stress-related disorders** and **autoimmune thyroid disease\*** based on protein-protein interaction enrichment analyses

| Biological Functions                   | Enriched terms | Description                                                 | P value  | q-value <sup>a</sup> |
|----------------------------------------|----------------|-------------------------------------------------------------|----------|----------------------|
| Signaling by G proteins/ GPCR          | R-HSA-418594   | G alpha (i) signalling events                               | 1.26E-08 | 3.98E-07             |
|                                        | R-HSA-373076   | Class A/1 (Rhodopsin-like receptors)                        | 1.58E-08 | 5.01E-07             |
|                                        | hsa04080       | Neuroactive ligand-receptor interaction                     | 2.00E-08 | 6.31E-07             |
| Cilium Assembly                        | R-HSA-5620912  | Anchoring of the basal body to the plasma membrane          | 1.00E-10 | 5.01E-09             |
|                                        | R-HSA-5617833  | Cilium Assembly                                             | 2.00E-09 | 7.94E-08             |
|                                        | R-HSA-1852241  | Organelle biogenesis and maintenance                        | 1.00E-08 | 3.16E-07             |
| Membrane Trafficking                   | R-HSA-8856825  | Cargo recognition for clathrin-mediated endocytosis         | 3.98E-08 | 1.26E-06             |
|                                        | R-HSA-8856828  | Clathrin-mediated endocytosis                               | 1.00E-07 | 3.16E-06             |
|                                        | R-HSA-199991   | Membrane Trafficking                                        | 1.00E-05 | 2.00E-04             |
| Interferons Signaling in Immune System | R-HSA-912694   | Regulation of IFNA signaling                                | 1.00E-32 | 1.00E-29             |
|                                        | R-HSA-933541   | TRAF6 mediated IRF7 activation                              | 1.00E-31 | 1.00E-28             |
|                                        | WP4558         | Overview of interferons-mediated signaling pathway          | 1.00E-30 | 1.00E-27             |
| Antigen Processing                     | R-HSA-983168   | Antigen processing: Ubiquitination & Proteasome degradation | 5.01E-10 | 2.00E-08             |
|                                        | R-HSA-983169   | Class I MHC mediated antigen processing & presentation      | 1.58E-09 | 6.31E-08             |
|                                        | R-HSA-174084   | Autodegradation of Cdh1 by Cdh1:APC/C                       | 6.31E-09 | 2.51E-07             |

\*Publicly available GWAS data for autoimmune thyroid disease include UK Biobank samples

<sup>a</sup> The q-value were calculated using the Benjamini-Hochberg procedure to account for multiple testing.

MCODE = Molecular Complex Detection algorithm.

**Table S20 Risk genes shared by posttraumatic stress disorder and autoimmune disease\***

| Gene ID   | Gene Symbol | Description                                       | Biological Process (GO)                                                                                   |
|-----------|-------------|---------------------------------------------------|-----------------------------------------------------------------------------------------------------------|
| 10632     | ATP5L       | ATP synthase membrane subunit g                   | GO:0042776 proton motive force-driven mitochondrial ATP synthesis                                         |
| 8510      | MMP23B      | matrix metalloproteinase 23B                      | GO:0030574 collagen catabolic process                                                                     |
| 95681     | CEP41       | centrosomal protein 41                            | GO:0018095 protein polyglutamylation                                                                      |
| 100873782 | RNU6-83P    | RNA, U6 small nuclear 83, pseudogene              |                                                                                                           |
| 100874080 | FARP1-AS1   | FARP1 antisense RNA 1                             |                                                                                                           |
| 100270909 | RPL7P31     | ribosomal protein L7 pseudogene 31                |                                                                                                           |
| 6885      | MAP3K7      | mitogen-activated protein kinase kinase kinase 7  | GO:0043276 anoikis                                                                                        |
| 338657    | CCDC84      | centrosomal AT-AC splicing factor                 | GO:0010826 negative regulation of centrosome duplication                                                  |
| 643       | CXCR5       | C-X-C motif chemokine receptor 5                  | GO:0048535 lymph node development                                                                         |
| 136259    | KLF14       | Kruppel like factor 14                            | GO:1902068 regulation of sphingolipid mediated signaling pathway                                          |
| 100302113 | MIR1200     | microRNA 1200                                     |                                                                                                           |
| 56912     | IFT46       | intraflagellar transport 46                       | GO:0035720 intraciliary anterograde transport                                                             |
| 106481545 | RNU6-1157P  | RNA, U6 small nuclear 1157, pseudogene            |                                                                                                           |
| 100271539 | RPL7AP61    | ribosomal protein L7a pseudogene 61               |                                                                                                           |
| 728642    | CDK11A      | cyclin dependent kinase 11A                       | GO:0050684 regulation of mRNA processing                                                                  |
| 677800    | SNORA12     | small nucleolar RNA, H/ACA box 12                 | GO:0006396 RNA processing                                                                                 |
| 100420200 | RPL7L1P12   | ribosomal protein L7 like 1 pseudogene 12         |                                                                                                           |
| 442668    | NECAP1P1    | NECAP endocytosis associated 1 pseudogene 1       |                                                                                                           |
| 10846     | PDE10A      | phosphodiesterase 10A                             | GO:0046069 cGMP catabolic process                                                                         |
| 100874096 | DOCK9-AS1   | DOCK9 antisense RNA 1                             |                                                                                                           |
| 8511      | MMP23A      | matrix metalloproteinase 23A (pseudogene)         |                                                                                                           |
| 1656      | DDX6        | DEAD-box helicase 6                               | GO:0019072 viral genome packaging                                                                         |
| 23187     | PHLDB1      | pleckstrin homology like domain family B member 1 | GO:1904259 regulation of basement membrane assembly involved in embryonic body morphogenesismorphogenesis |
| 11181     | TREH        | trehalase                                         | GO:0005993 trehalose catabolic process                                                                    |
| 9844      | ELMO1       | engulfment and cell motility 1                    | GO:0016601 Rac protein signal transduction                                                                |
| 372       | ARCN1       | archain 1                                         | GO:0021691 cerebellar Purkinje cell layer maturation                                                      |

\*GWAS summary statistics for posttraumatic stress disorder were from Psychiatric Genomics Consortium (23,212 cases and 151,447 controls) including UK Biobank samples.

**Table S21** Top three pathways of the corresponding shared MCODE components between **posttraumatic stress disorder** and **autoimmune diseases** based on protein-protein interaction enrichment analyses\*

| Biological Functions                 | Enriched terms | Description                                                                                            | P value  | q-value <sup>a</sup> |
|--------------------------------------|----------------|--------------------------------------------------------------------------------------------------------|----------|----------------------|
| Signaling by G proteins/<br>GPCR     | R-HSA-418594   | G alpha (i) signalling events                                                                          | 5.11E-12 | 1.03E-10             |
|                                      | R-HSA-500792   | GPCR ligand binding                                                                                    | 3.78E-11 | 7.58E-10             |
|                                      | R-HSA-388396   | GPCR downstream signalling                                                                             | 2.79E-10 | 2.06E-09             |
| Eukaryotic Translation<br>Initiation | R-HSA-72649    | Translation initiation complex formation                                                               | 3.78E-11 | 7.58E-10             |
|                                      | R-HSA-72702    | Ribosomal scanning and start codon recognition                                                         | 3.78E-11 | 7.58E-10             |
|                                      | R-HSA-72662    | Activation of the mRNA upon binding of the cap-binding complex and eIFs, and subsequent binding to 43S | 3.78E-11 | 7.58E-10             |
| Regulation of apoptotic<br>process   | GO:1902253     | regulation of intrinsic apoptotic signaling pathway by p53 class mediator                              | 9.12E-04 | 3.70E-03             |
|                                      | GO:0043408     | regulation of MAPK cascade                                                                             | 2.03E-03 | 8.23E-03             |
|                                      | GO:2001233     | regulation of apoptotic signaling pathway                                                              | 3.70E-03 | 1.36E-02             |
| MAPK1/MAPK3 signaling                | R-HSA-5658442  | Regulation of RAS by GAPs                                                                              | 3.35E-04 | 1.50E-03             |
|                                      | R-HSA-5673001  | RAF/MAP kinase cascade                                                                                 | 2.24E-03 | 8.23E-03             |
|                                      | R-HSA-5684996  | MAPK1/MAPK3 signaling                                                                                  | 2.24E-03 | 8.23E-03             |
| <a href="#">RHO GTPase cycle</a>     | R-HSA-9013404  | RAC2 GTPase cycle                                                                                      | 3.04E-04 | 1.36E-03             |
|                                      | R-HSA-9013423  | RAC3 GTPase cycle                                                                                      | 3.70E-03 | 1.23E-02             |
|                                      | WP185          | Integrin-mediated cell adhesion                                                                        | 4.09E-03 | 1.36E-02             |
| Innate Immune System                 | R-HSA-2424491  | DAP12 signaling                                                                                        | 1.52E-08 | 1.13E-07             |
|                                      | R-HSA-2172127  | DAP12 interactions                                                                                     | 4.14E-08 | 3.06E-07             |
|                                      | GO:0002223     | stimulatory C-type lectin receptor signaling pathway                                                   | 1.67E-05 | 5.55E-05             |
| TNF signaling                        | R-HSA-5357956  | TNFR1-induced NFkappaB signaling pathway                                                               | 4.10E-04 | 1.84E-03             |
|                                      | R-HSA-420092   | Glucagon-type ligand receptors                                                                         | 5.00E-04 | 2.03E-03             |
|                                      | R-HSA-168638   | NOD1/2 Signaling Pathway                                                                               | 5.53E-04 | 2.48E-03             |
| Gene expression<br>(Transcription)   | GO:0006366     | transcription by RNA polymerase II                                                                     | 6.14E-06 | 4.54E-05             |
|                                      | GO:0006351     | transcription, DNA-templated                                                                           | 4.54E-05 | 1.84E-04             |
|                                      | GO:0097659     | nucleic acid-templated transcription                                                                   | 4.54E-05 | 1.84E-04             |
| Disease-related pathway              | R-HSA-5663202  | Diseases of signal transduction by growth factor receptors and second messengers                       | 1.23E-03 | 4.99E-03             |
|                                      | hsa05226       | Gastric cancer                                                                                         | 2.74E-03 | 1.01E-02             |
|                                      | hsa04810       | Regulation of actin cytoskeleton                                                                       | 4.52E-03 | 1.50E-02             |

\*GWAS summary statistics for posttraumatic stress disorder were from Psychiatric Genomics Consortium (23,212 cases and 151,447 controls) including UK Biobank samples.

<sup>a</sup> The q-value were calculated using the Benjamini-Hochberg procedure to account for multiple testing.

MCODE = Molecular Complex Detection algorithm.



**Table S22 Risk genes shared by posttraumatic stress disorder and autoimmune thyroid disease\***

| Gene ID   | Gene Symbol | Description                                             | Biological Process (GO)                                                  |
|-----------|-------------|---------------------------------------------------------|--------------------------------------------------------------------------|
| 100526820 | CAHM        | colon adenocarcinoma hypermethylated                    |                                                                          |
| 106481023 | RN7SL366P   | RNA, 7SL, cytoplasmic 366, pseudogene                   |                                                                          |
| 106479000 | RNA5SP226   | RNA, 5S ribosomal pseudogene 226                        |                                                                          |
| 10846     | PDE10A      | phosphodiesterase 10A                                   | GO:0046069 cGMP catabolic process                                        |
| 6885      | MAP3K7      | mitogen-activated protein kinase kinase 7               | GO:0043276 anoikis                                                       |
| 5071      | PARK2       | parkin RBR E3 ubiquitin protein ligase                  | GO:1904049 negative regulation of spontaneous neurotransmitter secretion |
| 9444      | QKI         | QKI, KH domain containing RNA binding                   | GO:0042759 long-chain fatty acid biosynthetic process                    |
| 106479889 | RNU6-730P   | RNA, U6 small nuclear 730, pseudogene                   |                                                                          |
| 6068      | U3          | small nucleolar RNA, C/D box 3 pseudogene 1             |                                                                          |
| 135138    | PACRG       | parkin coregulated                                      | GO:0034620 cellular response to unfolded protein                         |
| 100505705 | SDIM1       | stress responsive DNAJB4 interacting membrane protein 1 | GO:0051402 neuron apoptotic process                                      |

\* GWAS summary statistics for posttraumatic stress disorder were from Psychiatric Genomics Consortium (23,212 cases and 151,447 controls) including UK Biobank samples. Publicly available GWAS data for autoimmune thyroid disease include UK Biobank samples.

**Table S23** Top three pathways of the corresponding shared MCODE components between **posttraumatic stress disorder** and **autoimmune thyroid diseases** based on protein-protein interaction enrichment analyses\*

| Biological Functions            | Enriched terms | Description                                                          | P value  | q-value <sup>a</sup> |
|---------------------------------|----------------|----------------------------------------------------------------------|----------|----------------------|
| Signaling by G proteins/ GPCR   | R-HSA-420092   | Glucagon-type ligand receptors                                       | 4.54E-05 | 1.84E-04             |
|                                 | R-HSA-9660821  | ADORA2B mediated anti-inflammatory cytokines production              | 4.54E-05 | 1.84E-04             |
|                                 | R-HSA-418555   | G alpha (s) signalling events                                        | 6.13E-05 | 2.75E-04             |
| Regulation of apoptotic process | R-HSA-5683057  | MAPK family signaling cascades                                       | 1.01E-02 | 2.73E-02             |
|                                 | hsa04151       | PI3K-Akt signaling pathway                                           | 1.11E-02 | 3.02E-02             |
|                                 | GO:0006417     | regulation of translation                                            | 1.66E-02 | 4.08E-02             |
| MAPK1/MAPK3 signaling           | M269           | PID RAS PATHWAY                                                      | 4.10E-04 | 1.66E-03             |
|                                 | R-HSA-5673001  | RAF/MAP kinase cascade                                               | 9.12E-04 | 3.35E-03             |
|                                 | R-HSA-5684996  | MAPK1/MAPK3 signaling                                                | 1.01E-03 | 3.35E-03             |
| Cytokine Signaling              | R-HSA-1280215  | Cytokine Signaling in Immune system                                  | 2.79E-10 | 5.60E-09             |
|                                 | R-HSA-5658442  | Regulation of RAS by GAPs                                            | 5.60E-09 | 4.14E-08             |
|                                 | R-HSA-8854050  | FBXL7 down-regulates AURKA during mitotic entry and in early mitosis | 1.52E-08 | 1.13E-07             |
| VEGF Signaling                  | M279           | PID RB 1PATHWAY                                                      | 2.74E-03 | 8.23E-03             |
|                                 | WP3888         | VEGFA-VEGFR2 signaling pathway                                       | 6.10E-03 | 1.83E-02             |
|                                 | GO:0002064     | epithelial cell development                                          | 1.01E-02 | 2.73E-02             |
| Cardiac conduction              | R-HSA-5576892  | Phase 0 - rapid depolarisation                                       | 8.25E-04 | 3.03E-03             |
|                                 | GO:2001257     | regulation of cation channel activity                                | 9.12E-04 | 3.35E-03             |
|                                 | GO:0043269     | regulation of ion transport                                          | 1.50E-03 | 5.52E-03             |

\* GWAS summary statistics for posttraumatic stress disorder were from Psychiatric Genomics Consortium (23,212 cases and 151,447 controls) including UK Biobank samples. Publicly available GWAS data for autoimmune thyroid disease include UK Biobank samples.

<sup>a</sup> The q-value were calculated using the Benjamini-Hochberg procedure to account for multiple testing.

MCODE = Molecular Complex Detection algorithm.

## Supplementary Figures

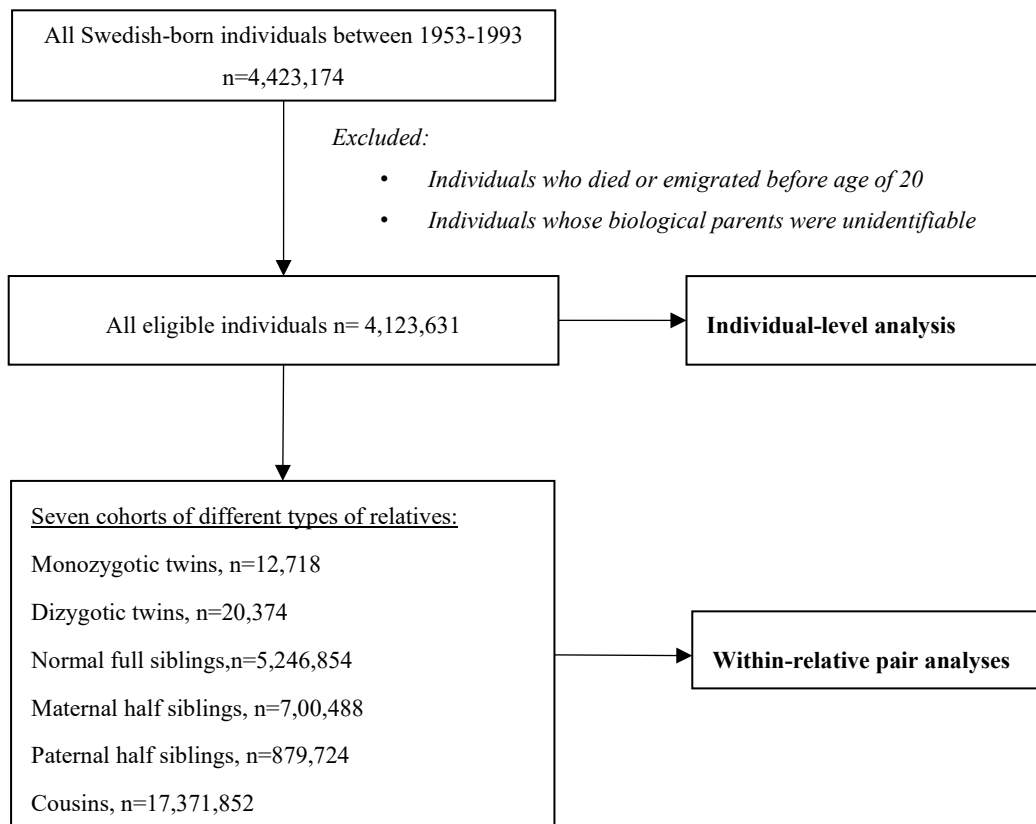

**Figure S1** Study design for familial co-aggregation analyses

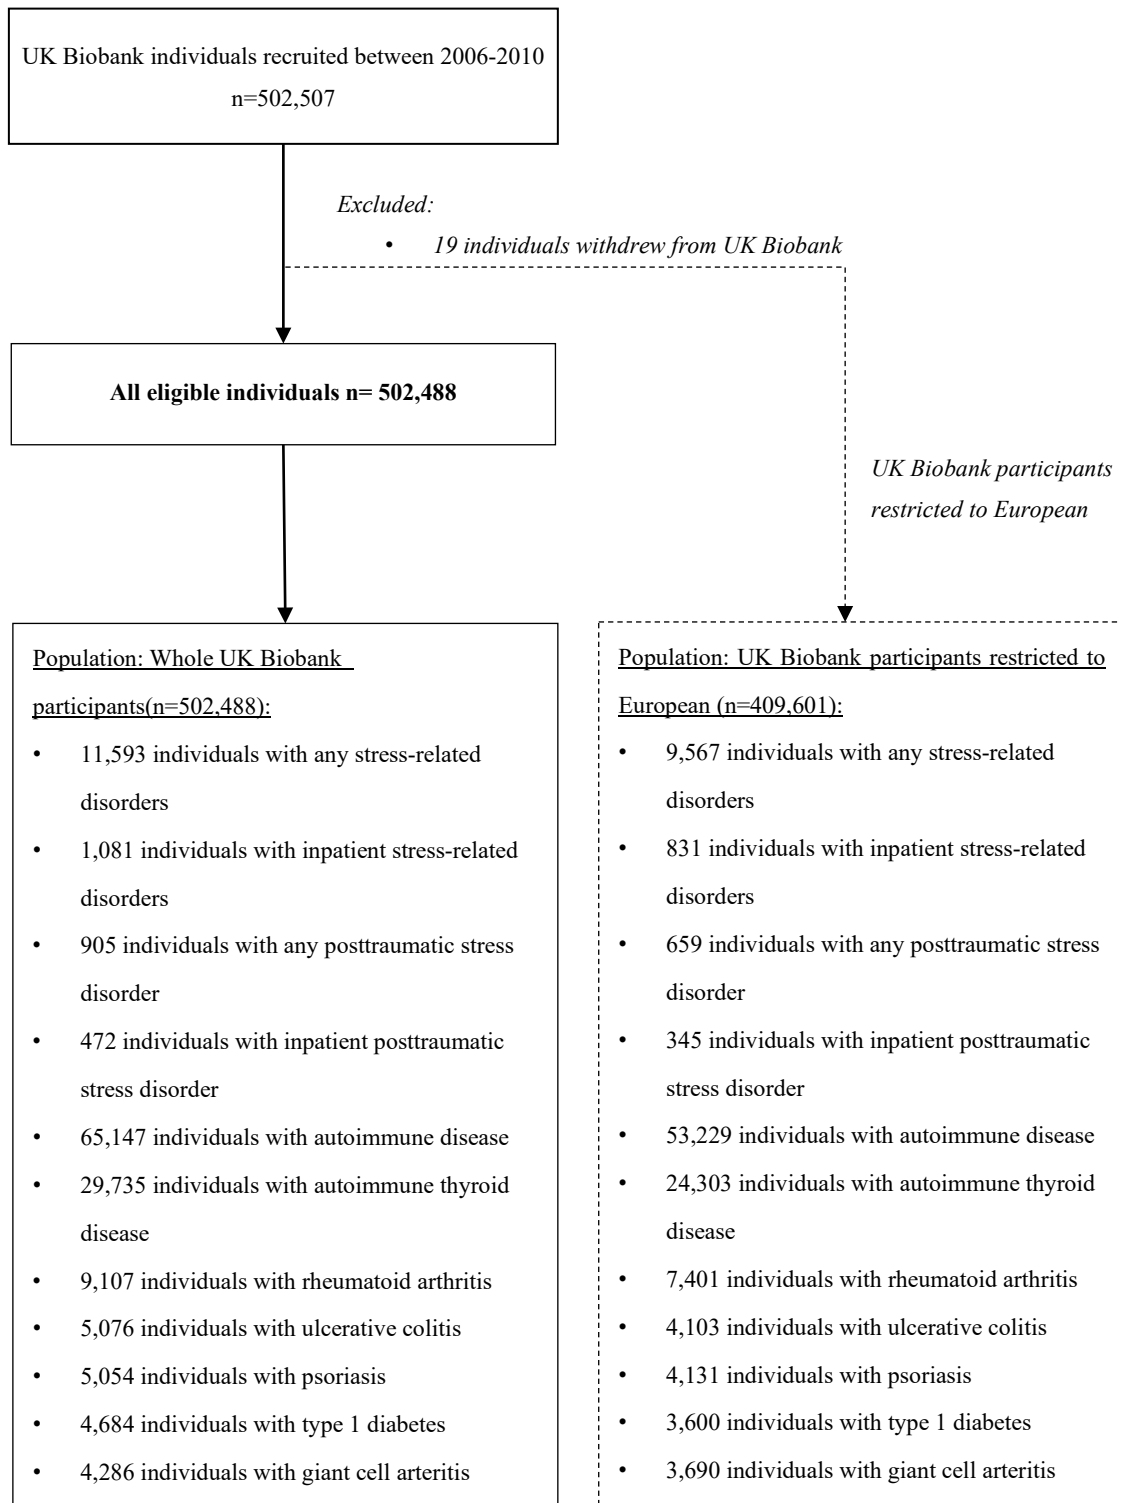

**Figure S2** Study design for phenotypic association analyses in UK Biobank

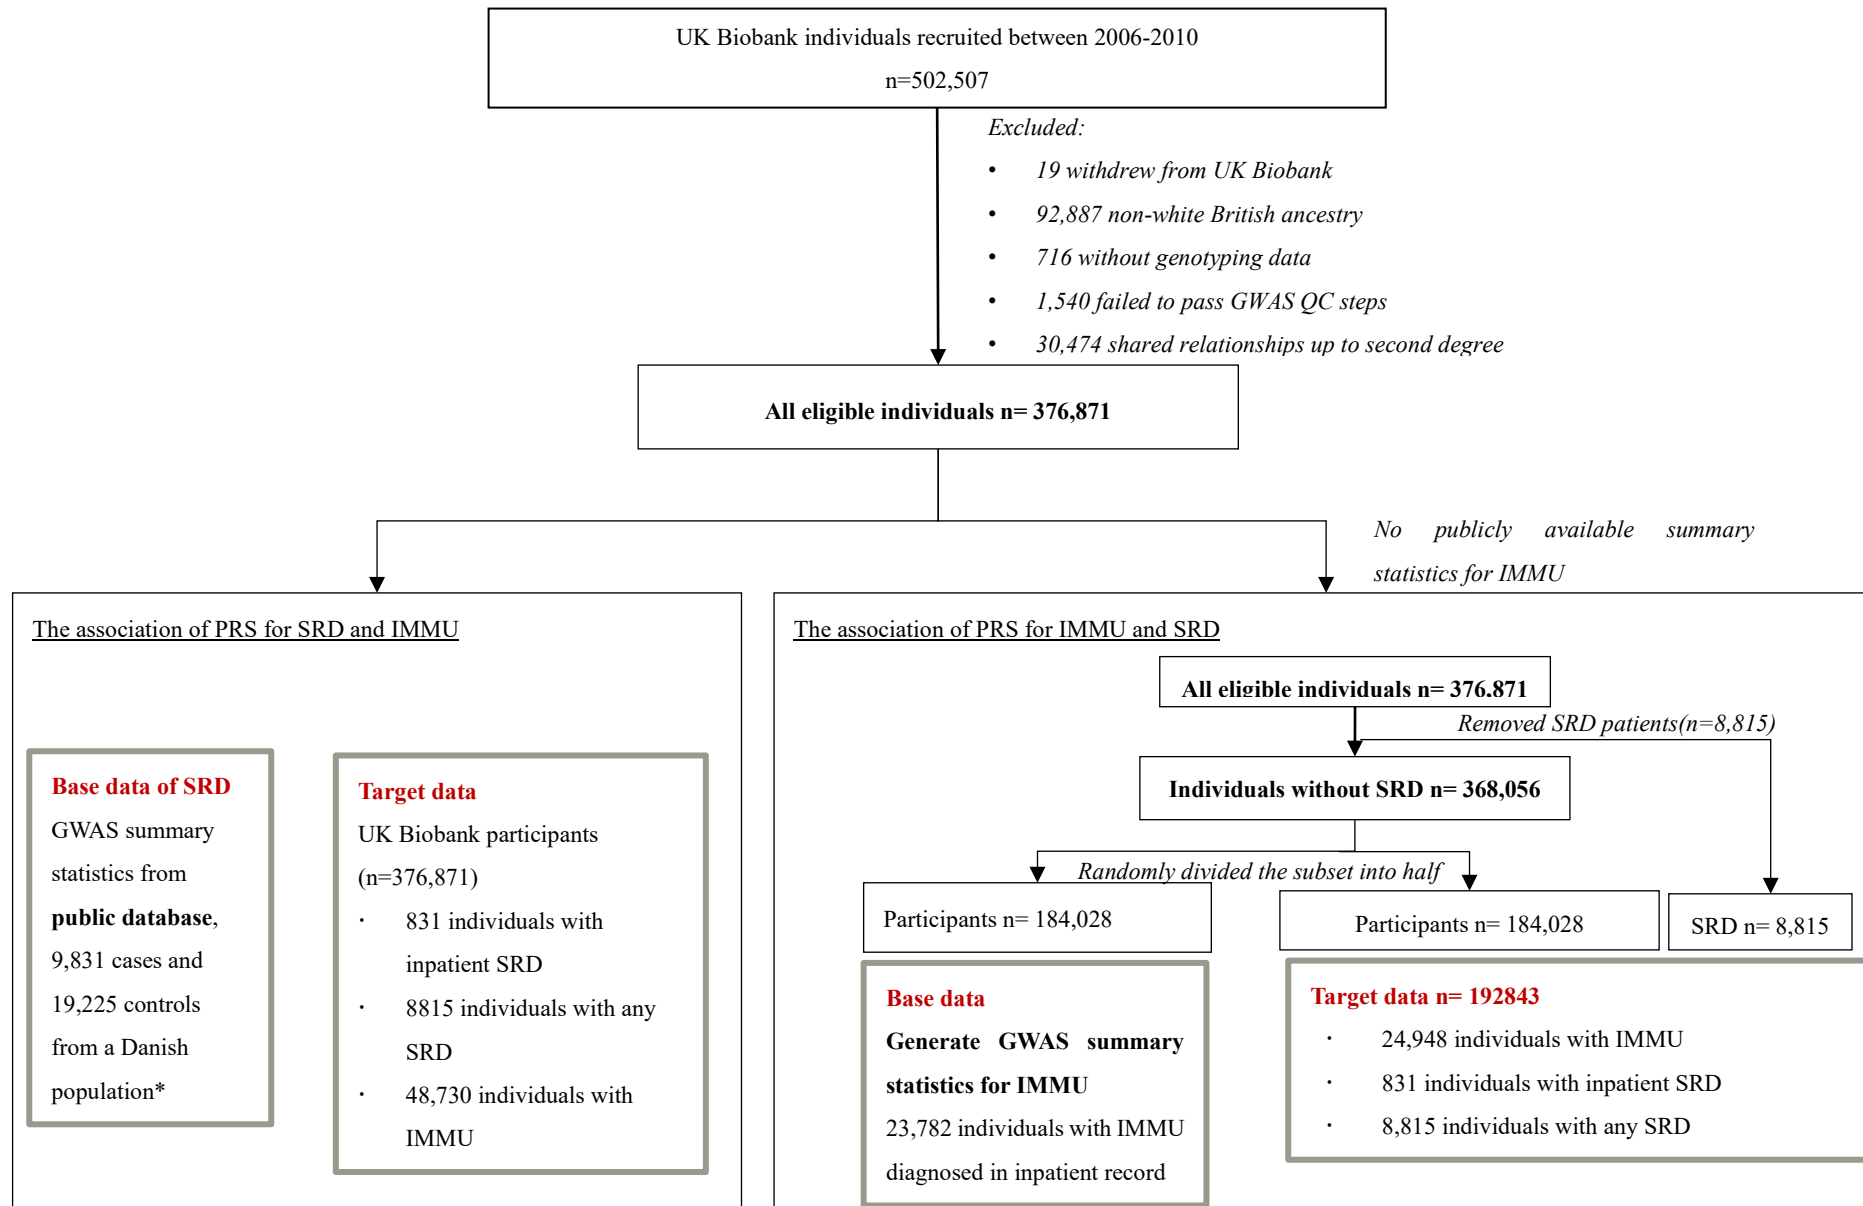

**Figure S3** Study design for polygenic risk scores (PRSs) analyses

\*GWAS summary statistics for stress-related disorders were from iPSYCH.

GWAS=genome-wide association studies; QC=quality control; PRS=polygenic risk score; SRD=stress-related disorders; IMMU=autoimmune disease.

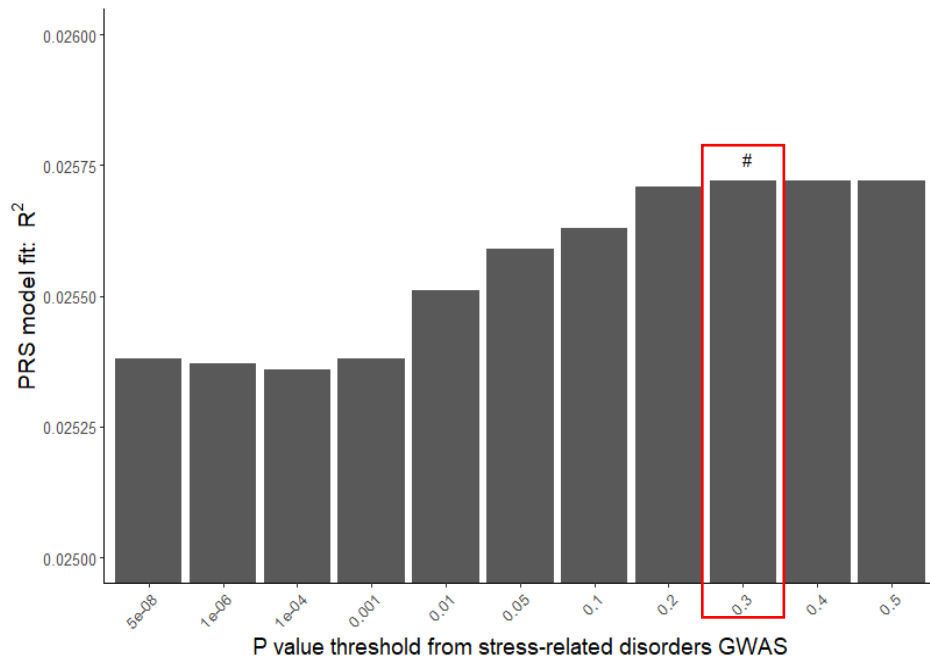

**Autoimmune disease** variance explained by **stress-related disorders** PRS

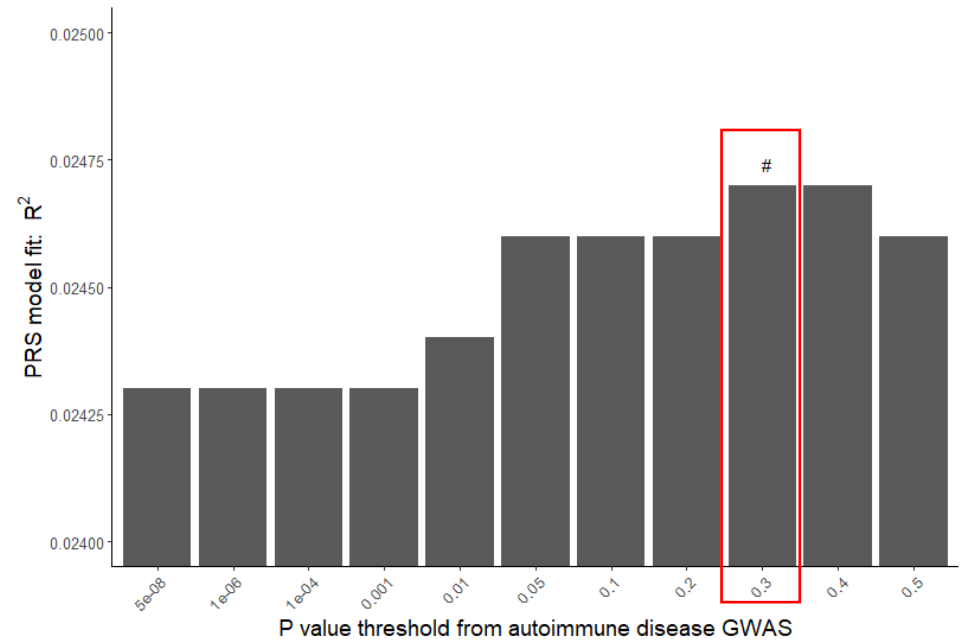

**Stress-related disorders** variance explained by **autoimmune disease** PRS

**Figure S4** Variance explained for one trait by polygenic risk scores (PRSs) for another trait under 11 p value thresholds

# The p value threshold with the highest variance explained was reported.

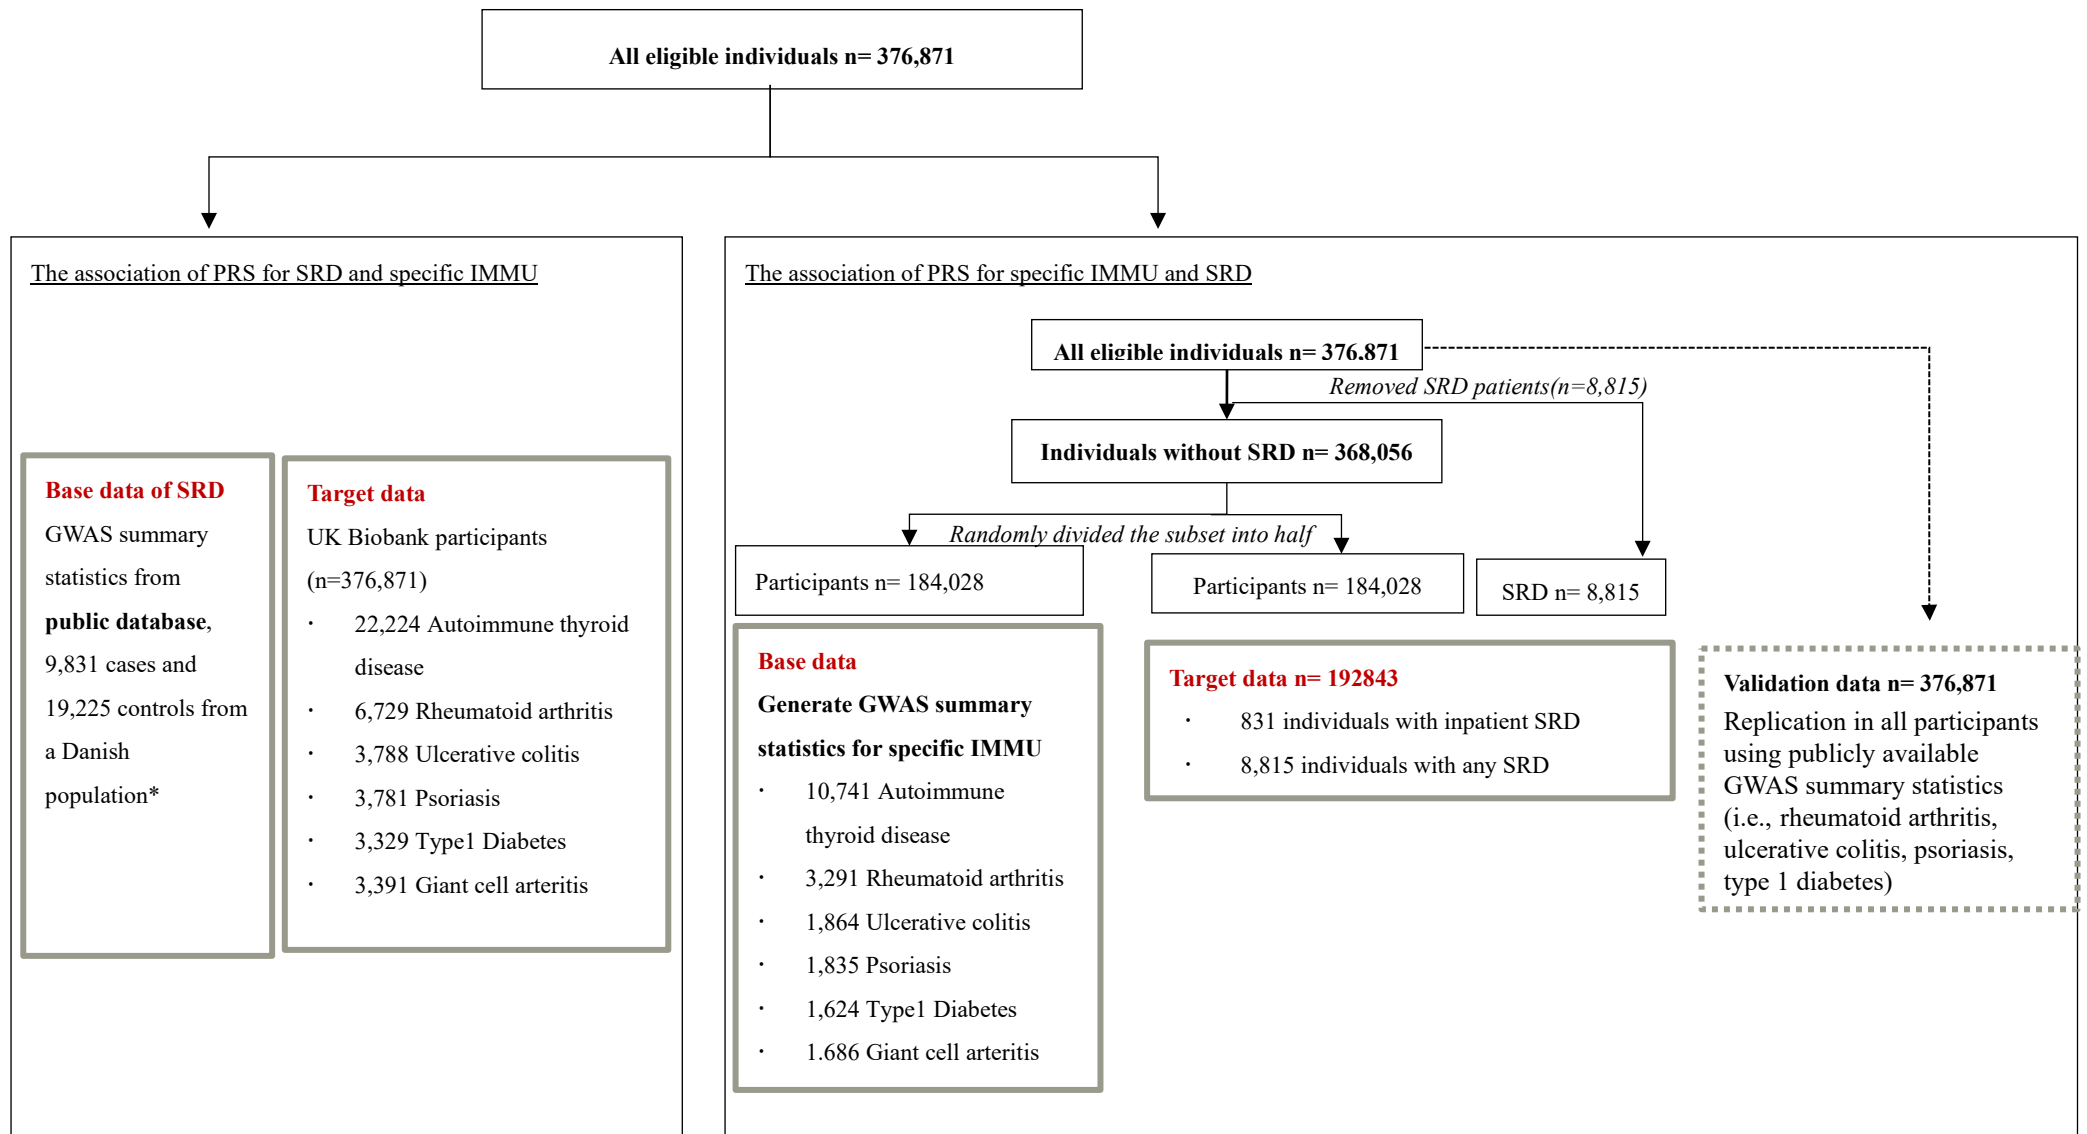

**Figure S5** Study design for polygenic risk scores (PRSs) analyses of specific disease type

\*GWAS summary statistics for stress-related disorders were from iPSYCH.

GWAS=genome-wide association studies; QC=quality control; PRS=polygenic risk score; SRD=stress-related disorders; IMMUs=autoimmune disease.

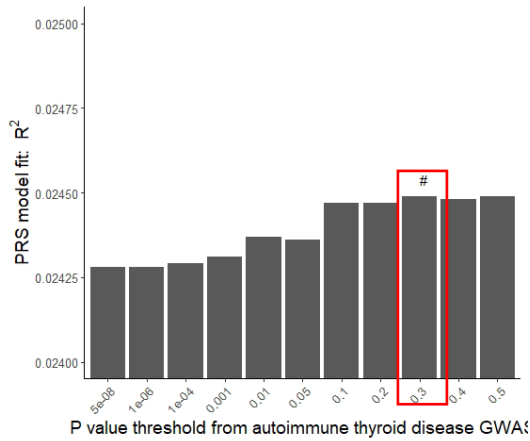

Variance explained by **autoimmune thyroid disease** PRS

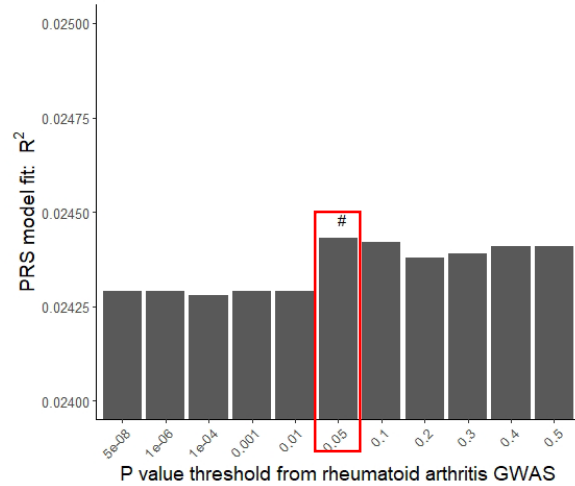

Variance explained by **rheumatoid arthritis** PRS

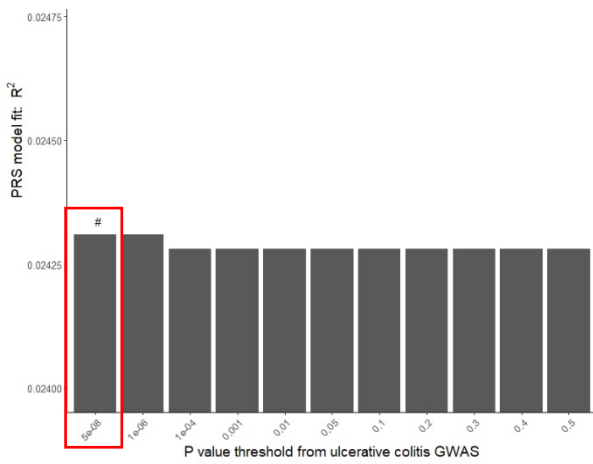

Variance explained by **ulcerative colitis** PRS

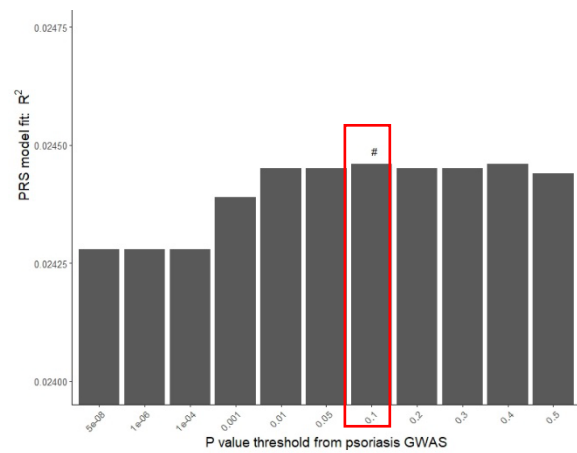

Variance explained by **psoriasis** PRS

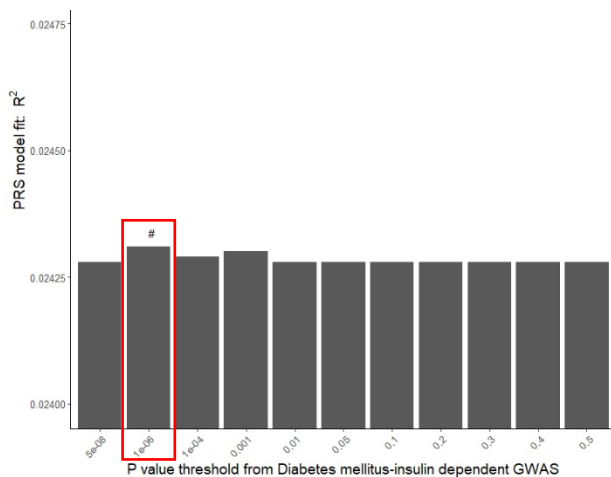

Variance explained by **diabetes mellitus-insulin dependent** PRS

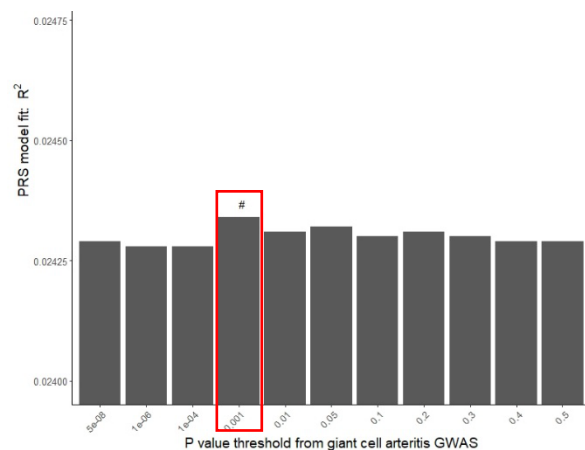

Variance explained by **giant cell arteritis** PRS

**Figure S6** Variance explained for stress-related disorders by polygenic risk scores (PRSs) for corresponding autoimmune disease under 11 p value thresholds (GWAS summary statistics from **UK Biobank GWAS data**)

# The p value threshold with the highest variance explained was selected for subsequent analyses

a



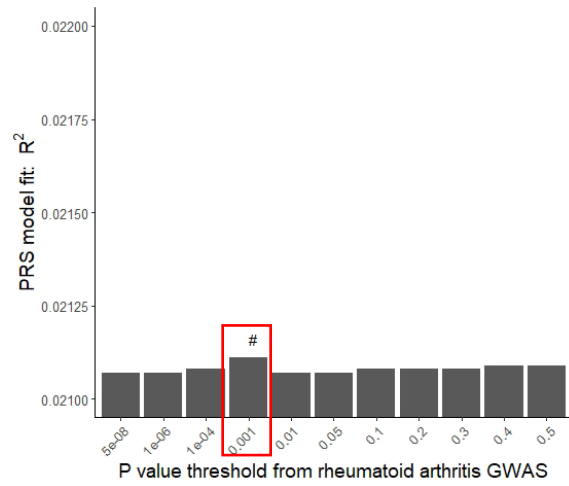

Variance explained by **rheumatoid arthritis** PRS

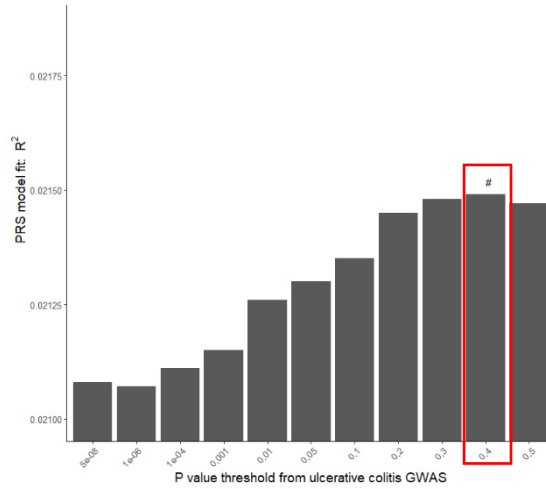

Variance explained by **ulcerative colitis** PRS

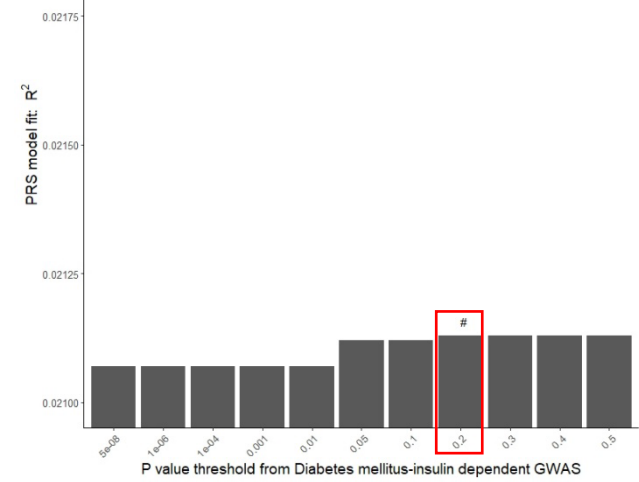

Variance explained by **diabetes mellitus-insulin dependent** PRS

**Figure S7** Variance explained for stress-related disorders by polygenic risk scores (PRSs) for corresponding autoimmune disease under 11 p value thresholds (GWAS summary statistics from **publicly available GWAS data**)

# The p value threshold with the highest variance explained was selected for subsequent analyses

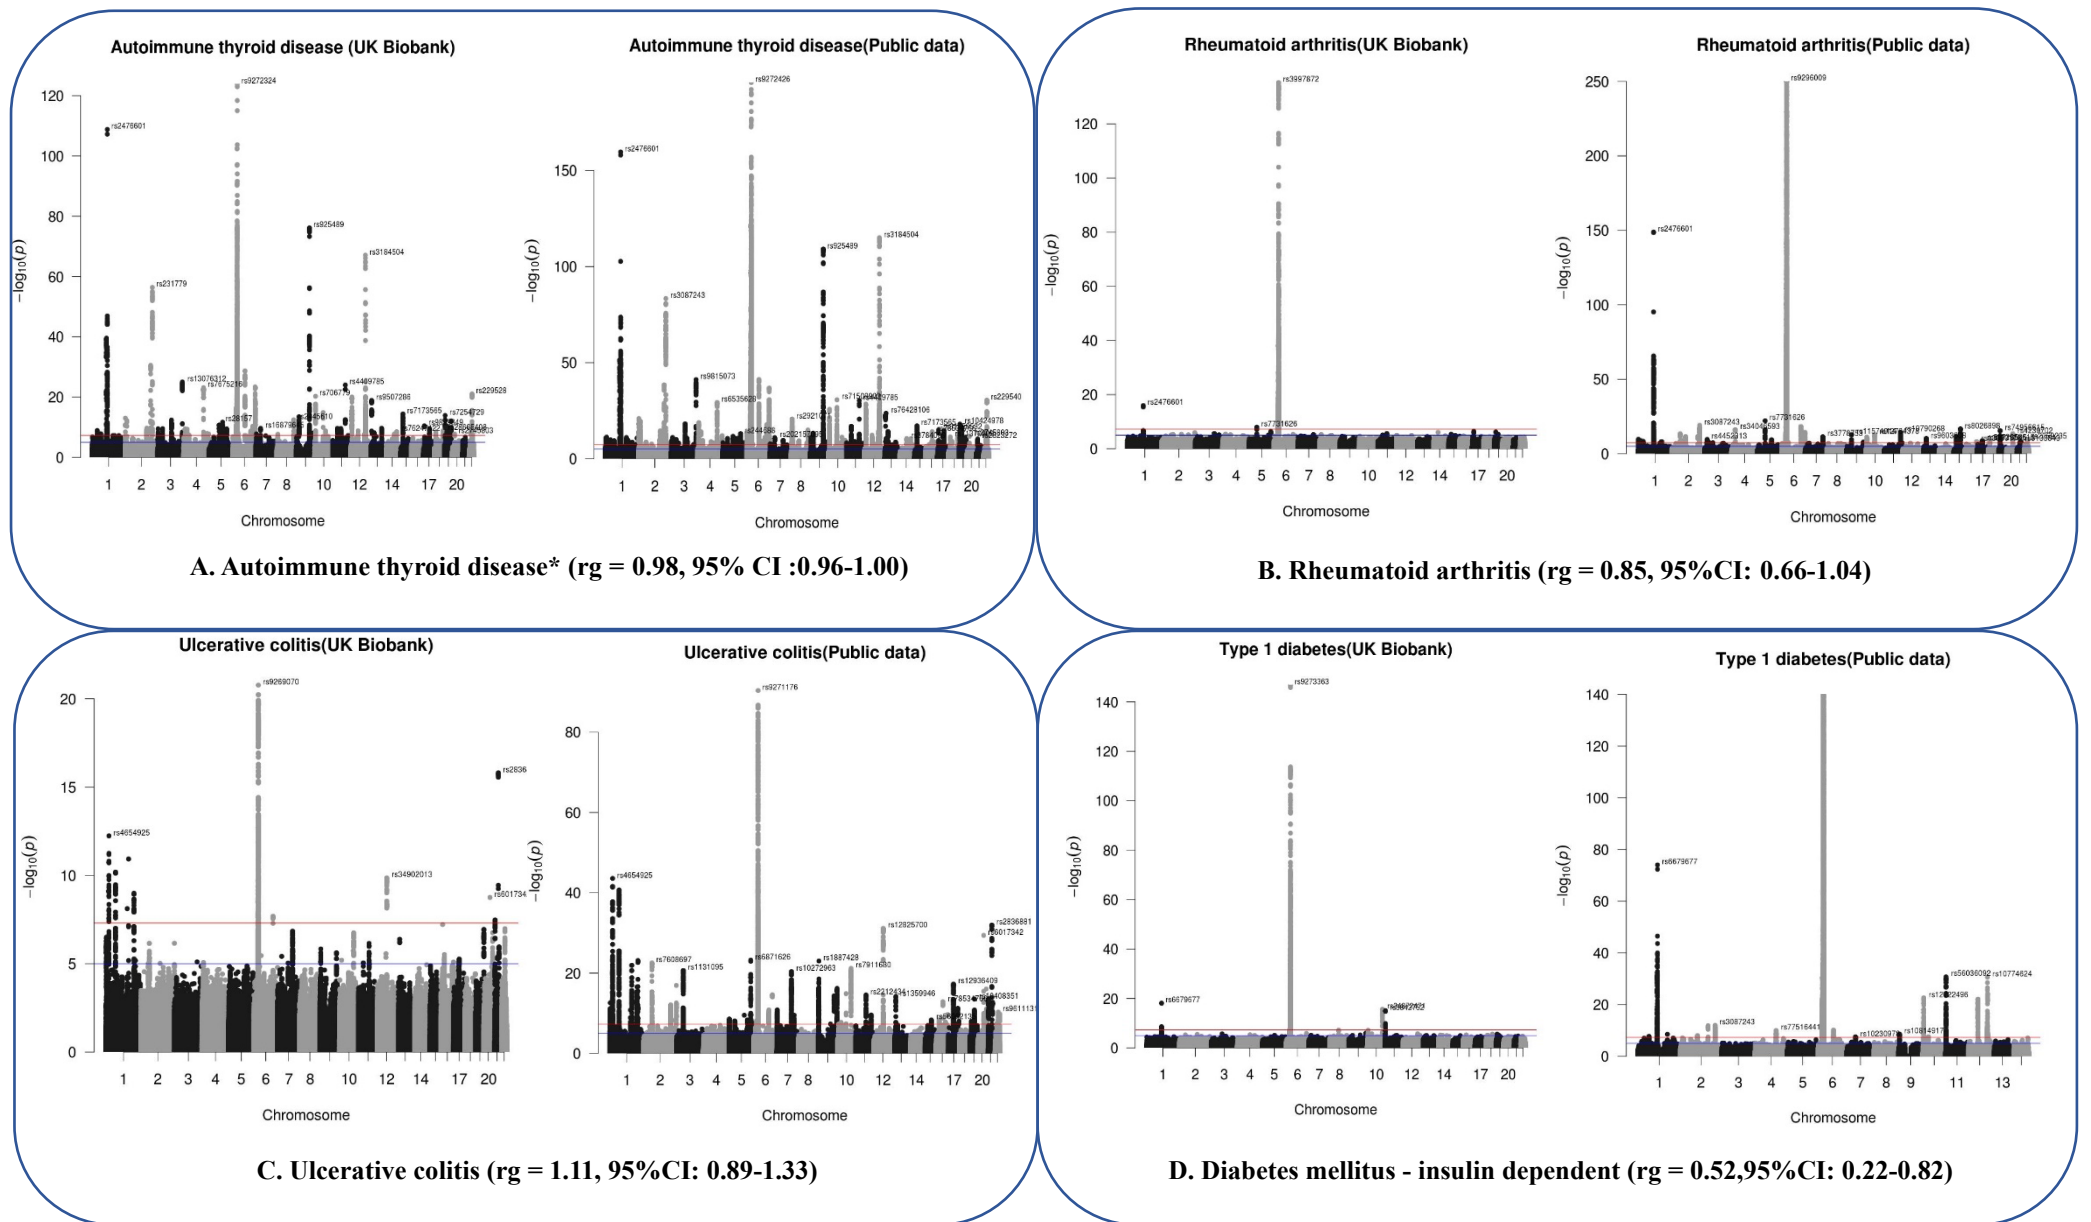

**Figure S8** Manhattan of the SNP-Based GWAS of corresponding autoimmune disease using UK Biobank data comparing with publicly available GWAS data.

\*Publicly available GWAS data for autoimmune thyroid disease include UK Biobank samples

SNP = single-nucleotide polymorphism. GWAS = genome-wide association studies. rg = genetic correlation assessed by LD score regression. CI = confidence interval.

|                                                             | Inpatient Stress-related disorder                                        |                    | Inpatient posttraumatic stress disorder               |                   |  |
|-------------------------------------------------------------|--------------------------------------------------------------------------|--------------------|-------------------------------------------------------|-------------------|--|
|                                                             | N(%) in patients / individuals without inpatient stress-related disorder | OR(95% CI)         | N(%) in patients / individuals without inpatient PTSD | OR(95% CI)        |  |
| <b>The whole UK Biobank participants(n=502,488)</b>         |                                                                          |                    |                                                       |                   |  |
| Autoimmune diseases                                         | 267 (24.7%)/64,880 (12.94%)                                              | 2.13(1.85 - 2.45)  | 119 (25.7%)/65,028 (12.95%)                           | 2.35 (1.90, 2.91) |  |
| Autoimmune thyroid disease                                  | 125 (11.56%)/29,610 (5.91%)                                              | 2.15 (1.78 - 2.61) | 54 (11.66%)/29,681 (5.91%)                            | 2.39 (1.78, 3.20) |  |
| Rheumatoid arthritis                                        | 35 (3.24%)/9,072 (1.81%)                                                 | 1.64 (1.16 - 2.30) | 18 (3.89%)/9,089 (1.81%)                              | 2.08 (1.29, 3.35) |  |
| Ulcerative colitis                                          | 19 (1.76%)/5,057 (1.01%)                                                 | 1.66 (1.06 - 2.63) | 8 (1.73%)/5,068 (1.01%)                               | 1.62 (0.80, 3.26) |  |
| Psoriasis                                                   | 29 (2.68%)/5,025 (1.00%)                                                 | 2.19 (1.51 - 3.18) | 15 (3.24%)/5,039 (1.00%)                              | 2.58 (1.54, 4.33) |  |
| Diabetes mellitus - insulin dependent                       | 29 (2.68%)/4,655 (0.93%)                                                 | 2.06 (1.42 - 3.00) | 14 (3.02%)/4,670 (0.93%)                              | 2.22 (1.29, 3.80) |  |
| Giant cell arteritis/ Polymyalgia rheumatica                | 13 (1.2%)/4,273 (0.85%)                                                  | 1.99 (1.14 - 3.45) | 3 (0.65%)/4,283 (0.85%)                               | 1.23 (0.39, 3.84) |  |
| <b>The white British UK Biobank participants(n=409,601)</b> |                                                                          |                    |                                                       |                   |  |
| Autoimmune diseases                                         | 201 (24.13%)/53,028 (12.97%)                                             | 2.04 (1.73 - 2.40) | 86 (24.29%)/53,143 (12.99%)                           | 2.18 (1.70, 2.80) |  |
| Autoimmune thyroid disease                                  | 99 (11.88%)/24,204 (5.92%)                                               | 2.22 (1.79 - 2.76) | 41 (11.58%)/24,262 (5.93%)                            | 2.41 (1.72, 3.38) |  |
| Rheumatoid arthritis                                        | 23 (2.76%)/7,378 (1.80%)                                                 | 1.39 (0.91 - 2.11) | 10 (2.82%)/7,391 (1.81%)                              | 1.52 (0.80, 2.86) |  |
| Ulcerative colitis                                          | 14 (1.68%)/4,089 (1.00%)                                                 | 1.58 (0.93 - 2.68) | 5 (1.41%)/4,098 (1.00%)                               | 1.29 (0.53, 3.13) |  |
| Psoriasis                                                   | 23 (2.76%)/4,108 (1.00%)                                                 | 2.16 (1.42 - 3.29) | 12 (3.39%)/4,119 (1.01%)                              | 2.58 (1.44, 4.61) |  |
| Diabetes mellitus, insulin dependent                        | 25 (3.00%)/3,575 (0.87%)                                                 | 2.41 (1.61 - 3.61) | 12 (3.39%)/3,588 (0.88%)                              | 2.58 (1.44, 4.63) |  |
| Giant cell arteritis/ Polymyalgia rheumatica                | 10 (1.20%)/3,680 (0.9%)                                                  | 1.85 (0.99 - 3.47) | 2 (0.56%)/3,688 (0.90%)                               | 1.01 (0.25, 4.07) |  |

**Figure S9** Association between inpatient stress-related disorders/ posttraumatic stress disorder and autoimmune disease

Odd ratio (OR) and 95% confidence interval (CI) were estimated by logistic regression models, adjusting for sex, birth year, sociodemographic factors (i.e., race/ethnicity, Townsend deprivation index, educational attainment, and annual household income), and life-style factors (i.e., body mass index, drinking status, and smoking status). N = number of cases of corresponding autoimmune disease. PTSD = posttraumatic stress disorder

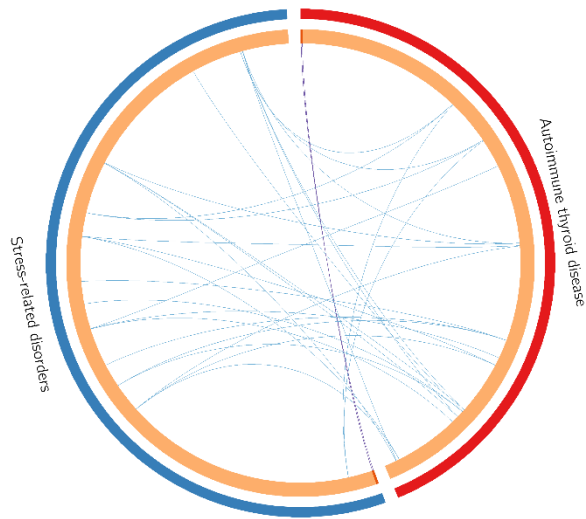

| Disease                    | GWAS data source       | Genetic association assessed by LD score regression |      | Statistics of input gene lists in PPI enrichment analysis |       |  |
|----------------------------|------------------------|-----------------------------------------------------|------|-----------------------------------------------------------|-------|--|
|                            |                        | rg (95% CI)                                         | P    | Number of Entrez gene ID                                  | Color |  |
| Autoimmune thyroid disease | UK Biobank and Iceland | 0.14(0.03-0.25)                                     | 0.01 | 509                                                       |       |  |
| Stress-related disorders   | iPSYCH                 |                                                     |      | 635                                                       |       |  |

**A. Genetic association and overlap between gene lists**

| Gene ID | Gene Symbol | Description                                 | Biological Process (GO)   | Related disease                                                                                                                    |
|---------|-------------|---------------------------------------------|---------------------------|------------------------------------------------------------------------------------------------------------------------------------|
| 6068    | SNORD3P1    | small nucleolar RNA, C/D box 3 pseudogene 1 |                           | Alzheimer's disease or family history of Alzheimer's disease; Phosphatidylethanolamine levels; Body mass index; Parental longevity |
| 692215  | SNORD112    | small nucleolar RNA, C/D box 112            | GO:0006396 RNA processing |                                                                                                                                    |

**B. Risk genes shared by stress-related disorders and autoimmune thyroid disease**

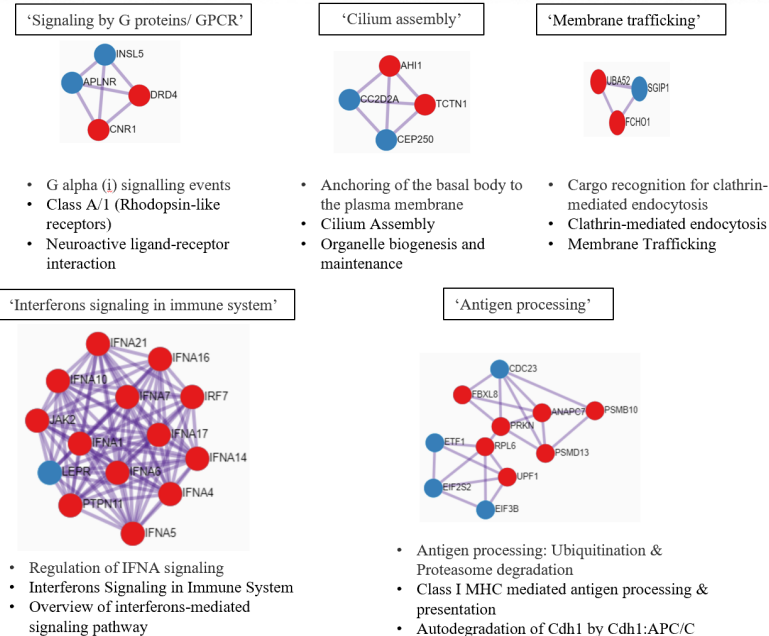

**C. Shared MCODE components identified in protein-protein interaction network and the top pathways of the corresponding components**

**Figure S10** Identification of genes and pathways shared by stress-related disorders and autoimmune thyroid disease\*

**A.** Genetic association and overlap between gene lists. Each candidate gene is assigned to one spot on the arc of the corresponding gene lists. Dark orange color represents the genes that appear in both lists and light orange color represents genes that are unique to that gene list. Purple curves link identical genes, and blue curves link genes that have different identities but share an enriched pathway/process (i.e., they represent the functional overlaps between gene lists). **B.** Risk genes shared by stress-related disorders and autoimmune thyroid disease. The short description for identical genes were annotated using the Metascape tool, and the related diseases were reported based on GWAS catalog. **C.** Shared MCODE component identified in protein-protein interaction network and the top pathways of the corresponding components, where each node represents a protein with a pie chart encoding its origin (i.e., blue for stress-related disorders and red for autoimmune thyroid disease).

GWAS=genome-wide association studies. rg = genetic correlation. P = P value. CI = confidence interval. GPCR=G Protein Coupled Receptors. MCODE =Molecular Complex Detection algorithm.

\*Publicly available GWAS data for autoimmune thyroid disease include UK Biobank samples

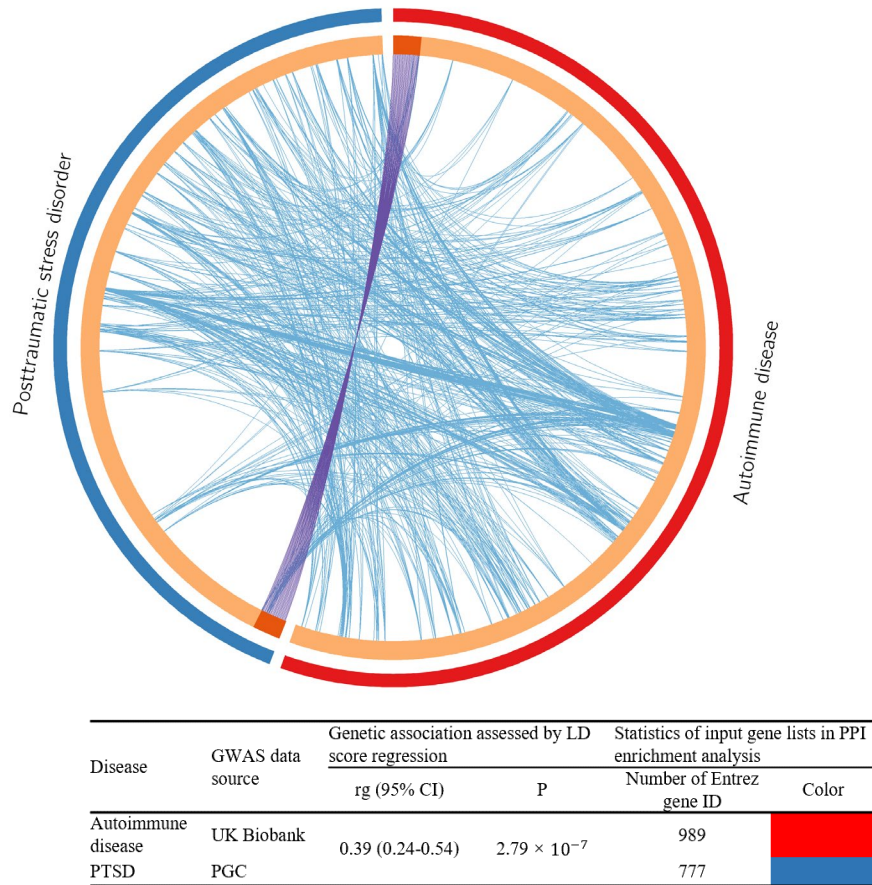

**A. Genetic association and overlap between gene lists**

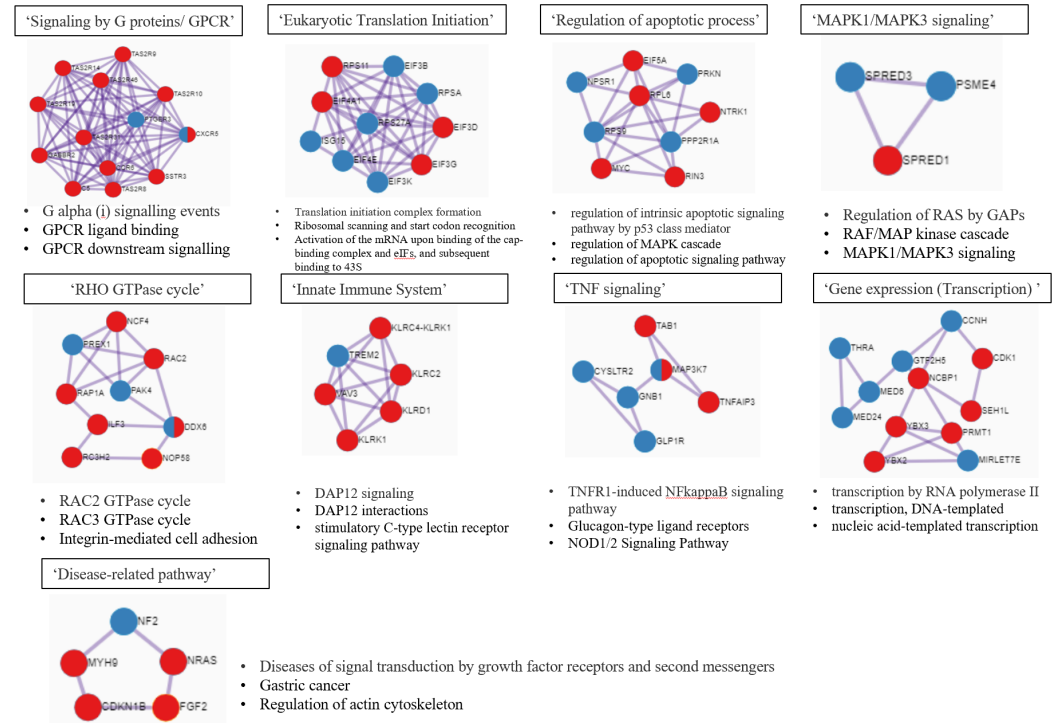

**B. Shared MCODE components identified in protein-protein interaction network and the top pathways of the corresponding components**

**Figure S11** Identification of genes and pathways shared by posttraumatic stress disorder and autoimmune disease\*

**A.** Genetic association and overlap between gene lists. Each candidate gene is assigned to one spot on the arc of the corresponding gene lists. Dark orange color represents the genes that appear in both lists and light orange color represents genes that are unique to that gene list. Purple curves link identical genes, and blue curves link genes that have different identities but share an enriched pathway/process (i.e., they represent the functional overlaps between gene lists). **B.** Shared MCODE component identified in protein-protein interaction network and the top pathways of the corresponding components, where each node represents a protein with a pie chart encoding its origin (i.e., blue for posttraumatic stress disorder and red for autoimmune disease).

\* GWAS summary statistics for posttraumatic stress disorder were from Psychiatric Genomics Consortium (23,212 cases and 151,447 controls) including UK Biobank samples.

PTSD = posttraumatic stress disorder. GWAS=genome-wide association studies. PGC = Psychiatric Genomics Consortium. GPCR=G Protein Coupled Receptors. rg = genetic correlation. P = P value. CI = confidence interval. GPCR=G Protein Coupled Receptors. MCODE =Molecular Complex Detection algorithm

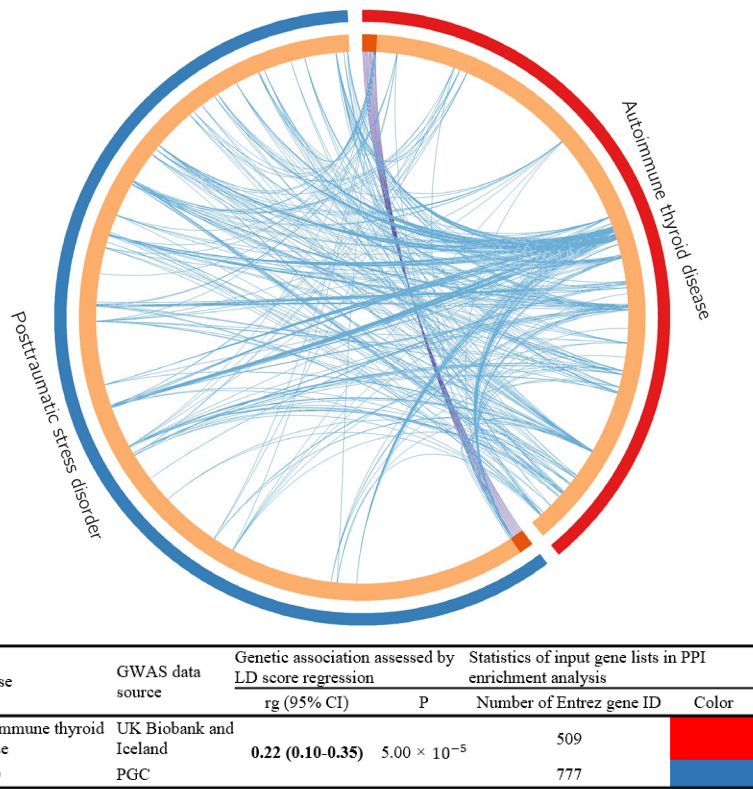

**A. Genetic association and overlap between gene lists**

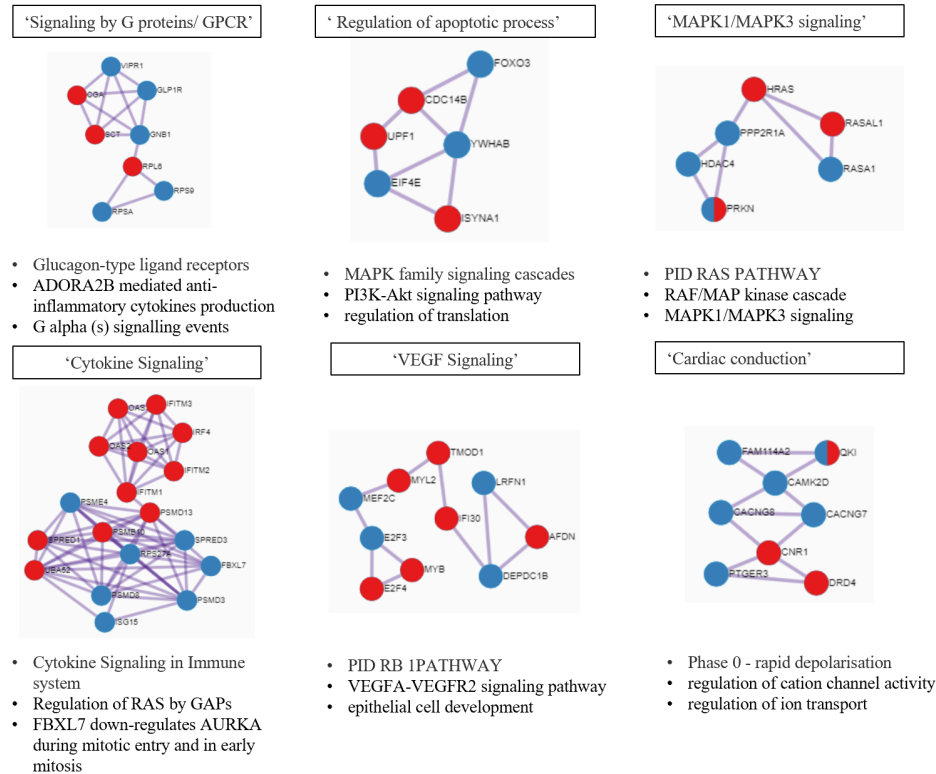

**B. Shared MCODE components identified in protein-protein interaction network and the top pathways of the corresponding components**

**Figure S12** Identification of genes and pathways shared by posttraumatic stress disorder and autoimmune thyroid disease\*

**A.** Genetic association and overlap between gene lists. Each candidate gene is assigned to one spot on the arc of the corresponding gene lists. Dark orange color represents the genes that appear in both lists and light orange color represents genes that are unique to that gene list. Purple curves link identical genes, and blue curves link genes that have different identities but share an enriched pathway/process (i.e., they represent the functional overlaps between gene lists). **B.** Shared MCODE component identified in protein-protein interaction network and the top pathways of the corresponding components, where each node represents a protein with a pie chart encoding its origin (i.e., blue for posttraumatic stress disorder and red for autoimmune thyroid disease).

\* GWAS summary statistics for posttraumatic stress disorder were from Psychiatric Genomics Consortium (23,212 cases and 151,447 controls) including UK Biobank samples. Publicly available GWAS data for autoimmune thyroid disease include UK Biobank samples.

PTSD = posttraumatic stress disorder. GWAS=genome-wide association studies. PGC = Psychiatric Genomics Consortium. GPCR=G Protein Coupled Receptors. rg = genetic correlation. P = P value. CI = confidence interval. GPCR=G Protein Coupled Receptors. MCODE =Molecular Complex Detection algorithm
